# Supplementary material
Source: PubMed Central journal article supplement (PMC7584441)

# THE LANCET

## Respiratory Medicine

### Supplementary appendix

This appendix formed part of the original submission. We post it as supplied by the authors.

Supplement to: Botta M, Tsonas A M, Pillay J, et al. Ventilation management and clinical outcomes in invasively ventilated patients with COVID-19 (PROVENT-COVID): a national, multicentre, observational cohort study. *Lancet Respir Med* 2020; published online October 23. [http://dx.doi.org/10.1016/S2213-2600\(20\)30459-8](http://dx.doi.org/10.1016/S2213-2600(20)30459-8).

# **Ventilation Management and Clinical Outcome in Invasively Ventilated COVID–19 Patients (PRoVENT–COVID) – a national, multicentre, observational cohort study**

Writing Committee for the PRoVENT–COVID\* Collaborative Group

\*‘PRactice of VENTilation in COVID–19 study’

Supplementary Appendix

## **LIST OF PRoVENT–COVID CENTERS, and local investigator**

Amsterdam UMC, location AMC, Amsterdam: M.J. Schultz  
Amphia hospital, Breda: T.C.D. Rettig  
Catharina hospital, Eindhoven: A.J.G.H. Bindels, P. van de Berg  
Dijklander hospital, Hoorn: P. van Velzen  
Flevoziekenhuis, Almere: M.E. Sleeswijk  
Gelderse Vallei, Ede: A.R.H. van Zanten  
Gelre hospital, Apeldoorn and Zutphen: P.E. Spronk  
Haaglanden MC, location Westeinde, the Hague: P. van Vliet  
Haga hospital, the Hague: I.M. Purmer  
Isala hospital, Zwolle: J.J. Haringman  
Maasstad hospital, Rotterdam: E.A.N. Oostdijk  
Maxima Medical Center, Veldhoven: J.P. Van Akkeren  
OLVG hospital, location East, Amsterdam: N.P. Juffermans  
Rijnstate hospital, Arnhem: A.C. Strang  
Reinier de Graaf Gasthuis, Delft: P.L.J. van der Heiden, L.A. Buiteman–Kruizinga  
Zuyderland hospital, Heerlen and Sittard: R. van der Horst  
University Medical Center, Groningen: J. Pillay  
Maastricht University Medical Centre, Maastricht: D.C.J.J. Bergmans

## PRoVENT–COVID Collaborative Group:

*Steering Committee:* (in alphabetic order) A.G. Algera<sup>1</sup>; L.S. Boers<sup>1</sup>; L.D.J. Bos<sup>1</sup>; M. Botta<sup>1</sup>; D.A. Dongelmans<sup>1</sup>; M.W. Hollmann<sup>2</sup>; J. Horn<sup>1</sup>; F. Paulus<sup>1,3</sup>; J. Pillay<sup>1</sup>; M.J. Schultz<sup>1,5,6</sup>; A. Serpa Neto<sup>4</sup>; A.M. Tsonas<sup>1</sup>; A.P.J. Vlaar<sup>1</sup>.

*Study coordinators:* (in alphabetic order) M. Botta; A.M. Tsonas.

*Investigators:* (in alphabetic order) J.P. van Akkeren<sup>7</sup>; A.G. Algera<sup>1</sup>; C.K. Algoe<sup>1</sup>; R.B. van Amstel<sup>1</sup>; O.L. Baur<sup>1</sup>; P. van de Berg<sup>8</sup>; A.E. van den Berg<sup>9</sup>; D.C.J.J. Bergmans<sup>10</sup>; D.I. van den Berselaar<sup>1</sup>; F.A. Bertens<sup>1</sup>; A.J.G.H. Bindels<sup>8</sup>; M.M. de Boer<sup>1</sup>; S. den Boer<sup>11</sup>; L.S. Boers<sup>1</sup>; M. Bogerd<sup>1</sup>; L.D.J. Bos<sup>1</sup>; M. Botta<sup>1</sup>; J.S. Breel<sup>2</sup>; H. de Bruin<sup>1</sup>; S. de Bruin<sup>1</sup>; C.L. Bruna<sup>1</sup>; L.A. Buiteman–Kruizinga<sup>12</sup>; O. L. Cremer<sup>13</sup>; R.M. Determann<sup>14</sup>; W. Dieperink<sup>15</sup>; D.A. Dongelmans<sup>1</sup>; H.S. Franke<sup>15</sup>; M.S. Galek -Aldridge<sup>1</sup>; M.J. de Graaff<sup>16</sup>; L.A. Hagens<sup>1</sup>; J.J. Haringman<sup>17</sup>; S.T. van der Heide<sup>1</sup>; P.L.J. van der Heiden<sup>12</sup>; N.F.L. Heijnen<sup>10</sup>; S.J.P. Hiel<sup>7</sup>; L.L. Hoeijmakers<sup>1</sup>; L. Hol<sup>1,2</sup>; M.W. Hollmann<sup>2</sup>; M.E. Hoogendoorn<sup>17</sup>; J. Horn<sup>1</sup>; R. P. van der Horst<sup>18</sup>; E.L.K. Ie<sup>1</sup>; D. Ivanov<sup>1</sup>; N.P. Juffermans<sup>14</sup>; E. Kho<sup>1</sup>; E.S. de Klerk<sup>2</sup>; A.W.M.M. Koopman-van Gemert<sup>19</sup>; M. Koopmans<sup>14</sup>; S. Kucukcelebi<sup>1</sup>; M.A. Kuiper<sup>20</sup>; D.W. de Lange<sup>13</sup>; N. van Mourik<sup>1</sup>; S.G. Nijbroek<sup>1,2</sup>; M. Onrust<sup>15</sup>; E.A.N. Oostdijk<sup>21</sup>; F. Paulus<sup>1,3</sup>; C.J. Pennartz<sup>1</sup>; J. Pillay<sup>1,15</sup>; L. Pisani<sup>1</sup>; I.M. Purmer<sup>22</sup>; T.C.D. Rettig<sup>23</sup>; J.P. Roozeman<sup>1</sup>; M.T.U. Schuijt<sup>1</sup>; M.J. Schultz<sup>1,5,6</sup>; A. Serpa Neto<sup>4</sup>; M.E. Sleswijk<sup>24</sup>; M.R. Smit<sup>1</sup>; P.E. Spronk<sup>25</sup>; W. Stilma<sup>1</sup>; A.C. Strang<sup>26</sup>; A.M. Tsonas<sup>1</sup>; P.R. Tuinman<sup>27</sup>; C.M.A. Valk<sup>1</sup>; F.L. Veen-Schra<sup>17</sup>; L.I. Veldhuis<sup>1</sup>; P. van Velzen<sup>9</sup>; W.H. van der Ven<sup>2</sup>; A.P.J. Vlaar<sup>1</sup>; P. van Vliet<sup>28</sup>; P.H.J. van der Voort<sup>15</sup>; L. van Welie<sup>29</sup>; H.J.F.T. Wesselink<sup>17</sup>; H.H. van der Wier-Lubbers<sup>17</sup>; B. van Wijk<sup>1</sup>; T. Winters<sup>1</sup>; W.Y. Wong<sup>1</sup>; A.R.H. van Zanten<sup>29</sup>.

*Affiliations:* **Amsterdam University Medical Centers, location ‘Academic Medical Center’, Amsterdam, The Netherlands:** <sup>1</sup>Department of Intensive Care, <sup>2</sup>Department of Anesthesiology; **Amsterdam University of Applied Sciences, Faculty of Health, Amsterdam, The Netherlands:** <sup>3</sup>ACHIEVE, Centre of Applied Research; **Hospital Israelita Albert Einstein; São Paulo, Brazil:** <sup>4</sup>Department of Critical Care Medicine; **Mahidol University, Bangkok, Thailand:** <sup>5</sup>Mahidol–Oxford Tropical Medicine Research Unit (MORU); **University of Oxford, Oxford, United Kingdom:** <sup>6</sup>Nuffield Department of Medicine; **Maxima Medical Center, Eindhoven, The Netherlands:** <sup>7</sup>Department of Intensive Care; **Catharina Hospital, Eindhoven, The Netherlands:** <sup>8</sup>Department of Intensive Care; **Dijklander Hospital, location Hoorn, Hoorn, The Netherlands:** <sup>9</sup>Department of Intensive Care; **Maastricht University Medical Center, Maastricht, The Netherlands:** <sup>10</sup>Department of Intensive Care; **Spaarne Hospital, Haarlem, The Netherlands:** <sup>11</sup>Department of Intensive Care; **Reinier de Graaf Hospital, Delft, The Netherlands:** <sup>12</sup>Department of Intensive Care; **Universitiy Medical Center Utrecht, Utrecht, The Nethelands:** <sup>13</sup>Department of Intensive Care; **OLVG hospital, location East, Amsterdam, The Netherlands:** <sup>14</sup>Department of Intensive Care; **University Medical Center Groningen, Groningen, The Netherlands:** <sup>15</sup>Department of Intensive Care; **Sint Antonius Hospital, Nieuwegein, The Netherlands:** <sup>16</sup>Department of Intensive Care; **Isala Hospital, Zwolle, The Netherlands:** <sup>17</sup>Department of Intensive Care; **Zuyderland Hospital, Heerlen and Sittard, The Netherlands:** <sup>18</sup>Department of Intensive Care; **ZGT Hospital, Almelo, The Netherlands:** <sup>19</sup>Department of Intensive Care; **Medical Center Leeuwarden, Leeuwarden, The Netherlands:** <sup>20</sup>Department of Intensive Care; **Maasstad Hospital, Rotterdam, The Netherlands:** <sup>21</sup>Department of Intensive Care; **Haga Hospital, the Hague, The Netherlands:** <sup>22</sup>Department of Intensive Care; **Amphia Hospital, Breda, The Netherlands:** <sup>23</sup>Department of Intensive Care; **Flevo Hospital, Almere, The Netherlands:** <sup>24</sup>Department of Intensive Care; **Gele Hospital, Apeldoorn and Zutphen, The Netherlands:** <sup>25</sup>Department of Intensive Care; **Rijnstate Hospital, Arnhem, The Netherlands:** <sup>26</sup>Department of Intensive Care; **Amsterdam University Medical Centers, location ‘VU Medical Center’, Amsterdam, The Netherlands:** <sup>27</sup>Department of Intensive Care; **Haaglanden Medical Center, location Westeinde, the Hague, The Netherlands:** <sup>28</sup>Department of Intensive Care; **Gelderse Vallei Hospital, Ede, The Netherlands:** <sup>29</sup>Department of Intensive Care.

# **PRactice of VENTilation in COVID–19 patients (PRoVENT- COVID) – an observational study of invasively ventilated patients in the Netherlands**

Noor Boers<sup>1</sup>, Michela Botta<sup>1</sup>, Anissa Tsonas<sup>1</sup>, Anna Geke Algera<sup>1</sup>, Janesh Pillay<sup>1</sup>,  
Dave Dongelmans<sup>1</sup>, Janneke Horn<sup>1</sup>, Alexander Vlaar<sup>1</sup>, Markus Hollmann<sup>2</sup>, Lieuwe  
Bos<sup>1</sup>, Frederique Paulus<sup>1,3</sup>, Ary Serpa Neto<sup>4</sup>, Marcus J. Schultz<sup>1,5,6</sup> for the  
PRoVENT–COVID collaborators

**Amsterdam University Medical Centers, location ‘Academic Medical Center’,  
Amsterdam, The Netherlands:**

<sup>1</sup>Department of Intensive Care

<sup>2</sup>Department of Anesthesiology

**Amsterdam University of Applied Sciences, Faculty of Health, Amsterdam, The  
Netherlands:**

<sup>3</sup>ACHIEVE, Centre of Applied Research

**Hospital Israelita Albert Einstein; São Paulo, Brazil:**

<sup>4</sup>Department of Critical Care Medicine

**Mahidol University, Bangkok, Thailand:**

<sup>5</sup>Mahidol–Oxford Tropical Medicine Research Unit (MORU)

**University of Oxford, Oxford, United Kingdom:**

<sup>6</sup>Nuffield Department of Medicine

**Correspondence:**

Prof. M.J. Schultz, MD PhD  
Department of Intensive Care  
C3-423  
Meibergdreef 9  
1105 AZ Amsterdam  
The Netherlands  
Email: [m.j.schultz@amsterdamumc.nlm](mailto:m.j.schultz@amsterdamumc.nlm)

## TABLE OF CONTENTS

|       |                                                                                                                      |    |
|-------|----------------------------------------------------------------------------------------------------------------------|----|
| 1.    | INTRODUCTION AND RATIONALE .....                                                                                     | 9  |
| 1.1   | The coronavirus disease 2019 .....                                                                                   | 9  |
| 1.2   | Lung protective ventilation .....                                                                                    | 9  |
| 1.3   | Need for an observational study on ventilator settings .....                                                         | 9  |
| 2.    | OBJECTIVES AND HYPOTHESIS .....                                                                                      | 10 |
| 2.1   | Objectives.....                                                                                                      | 10 |
| 2.1.1 | Primary objective .....                                                                                              | 10 |
| 2.1.2 | Secondary objective .....                                                                                            | 10 |
| 2.2   | Hypothesis.....                                                                                                      | 10 |
| 2.2.1 | Primary hypothesis .....                                                                                             | 10 |
| 2.2.2 | Secondary hypothesis .....                                                                                           | 10 |
| 3.    | STUDY DESIGN.....                                                                                                    | 11 |
| 4.    | STUDY POPULATION .....                                                                                               | 12 |
| 4.1   | Population (base) .....                                                                                              | 12 |
| 4.2   | Inclusion criteria .....                                                                                             | 12 |
| 4.3   | Exclusion criteria .....                                                                                             | 12 |
| 4.4   | Sample size calculation.....                                                                                         | 12 |
| 5.    | METHODS.....                                                                                                         | 13 |
| 5.1   | Study parameters/endpoints .....                                                                                     | 13 |
| 5.1.1 | Main study parameters .....                                                                                          | 13 |
| 5.1.2 | Secondary study parameters.....                                                                                      | 13 |
| 5.2   | Randomisation, blinding and treatment allocation .....                                                               | 13 |
| 5.3   | Study procedures .....                                                                                               | 13 |
| 5.4   | Data collection.....                                                                                                 | 13 |
| 5.4.1 | Demographic data.....                                                                                                | 13 |
| 5.4.2 | Data on day of intubation OR admission to ICU if transferred from another hospital with mechanical ventilation ..... | 13 |
| 5.4.3 | Repeated measures .....                                                                                              | 13 |
| 5.5   | Withdrawal of individual subjects .....                                                                              | 14 |
| 5.6   | Replacement of individual subjects after withdrawal .....                                                            | 14 |
| 5.7   | Follow-up of subjects withdrawn from treatment.....                                                                  | 14 |
| 5.8   | Premature termination of the study .....                                                                             | 15 |
| 6.    | SAFETY REPORTING .....                                                                                               | 16 |
| 6.1   | Temporary halt for reasons of subject safety .....                                                                   | 16 |
| 6.2   | Serious adverse events (SAEs) .....                                                                                  | 16 |
| 6.3   | Follow-up of adverse events .....                                                                                    | 16 |
| 6.4   | Data Safety Monitoring Board (DSMB) .....                                                                            | 16 |
| 7.    | STATISTICAL ANALYSIS .....                                                                                           | 17 |
| 8.    | ETHICAL CONSIDERATIONS .....                                                                                         | 18 |
| 8.1   | Regulation statement .....                                                                                           | 18 |
| 8.2   | Recruitment and consent .....                                                                                        | 18 |

|     |                                                            |    |
|-----|------------------------------------------------------------|----|
| 8.3 | Benefits and risks assessment, group relatedness.....      | 18 |
| 8.4 | Compensation for injury .....                              | 18 |
| 9.  | ADMINISTRATIVE ASPECTS, MONITORING AND PUBLICATION .....   | 19 |
| 9.1 | Handling and storage of data and documents .....           | 19 |
| 9.2 | Monitoring and Quality Assurance .....                     | 19 |
| 9.3 | Amendments .....                                           | 19 |
| 9.4 | Annual progress report.....                                | 19 |
| 9.5 | Temporary halt and (prematurely) end of study report ..... | 19 |
| 9.6 | Public disclosure and publication policy.....              | 19 |
| 10. | REFERENCES .....                                           | 20 |

## LIST OF ABBREVIATIONS AND RELEVANT DEFINITIONS

|                               |                                                |
|-------------------------------|------------------------------------------------|
| AKI                           | Acute Kidney Injury                            |
| APACHE                        | Acute Physiology And Chronic Health Evaluation |
| ARDS                          | Acute Respiratory Distress Syndrome            |
| COVID-19                      | Coronavirus disease 2019                       |
| DP                            | Driving Pressure                               |
| EtCO <sub>2</sub>             | End-tidal Carbon Dioxide                       |
| FiO <sub>2</sub>              | Fraction of inspired Oxygen                    |
| HCO <sub>3</sub> <sup>-</sup> | Bicarbonate                                    |
| IBW                           | Ideal Body Weight                              |
| ICU                           | Intensive Care Unit                            |
| I:E ratio                     | Inspiratory : Expiratory ratio                 |
| NIV                           | Non-invasive ventilation                       |
| P <sub>max</sub>              | Maximum airway pressure                        |
| P <sub>peak</sub>             | Peak pressure                                  |
| P <sub>plateau</sub>          | Plateau pressure                               |
| PaO <sub>2</sub>              | Partial Arterial Pressure of Oxygen            |
| PaCO <sub>2</sub>             | Partial Arterial Pressure of Carbon Dioxide    |
| PBW                           | Predicted Body Weight                          |
| PEEP                          | Positive End-Expiratory Pressure               |
| RR                            | Respiratory Rate                               |
| SaO <sub>2</sub>              | Saturation of Arterial Oxygen                  |
| SAPS                          | Simplified Acute Physiology Score              |
| SARS-CoV-2                    | Severe acute respiratory coronavirus-2         |
| SD                            | Standard Deviation                             |
| SOFA                          | Sequential Organ Failure Assessment Score      |
| SpO <sub>2</sub>              | Saturation of peripheral Oxygen                |
| V <sub>T</sub>                | Tidal Volume                                   |
| VILI                          | Ventilator induced lung injury                 |
| VTE                           | Expiratory tidal volume                        |



## **SUMMARY**

### **Rationale**

The novel coronavirus disease (COVID–19) pandemic is rapidly expanding across the world, with over 60.000 new cases each day as of late March 2020. Healthcare workers are struggling to provide the best care for patients with proven or suspected COVID–19. Approaches for clinical care vary widely between and within countries and new insights are acquired rapidly. This includes the way invasive ventilation is applied.

### **Objective**

To determine and compare invasive ventilation settings and parameters in COVID–19 patients in the Netherlands, and to determine associations with clinical outcomes.

### **Hypotheses**

Invasive ventilation settings and parameters vary between intensive care units (ICUs) in hospitals in the Netherlands; certain ventilator settings have an independent association with duration of ventilation in COVID–19 patients.

### **Study design**

National, multicenter, service review.

### **Study population**

Invasively ventilated patients with proven or suspected COVID–19.

### **Methods**

In every patient, granular ventilator settings and parameters are collected from start of invasive ventilation for up to 72 hours. Patients will be followed up until ICU and hospital discharge, and until day 90.

### **Study endpoints**

Main ventilator settings (including tidal volume, airway pressures, oxygen fraction and respiratory rate) (primary) and parameters (blood gas results); use of rescue therapies (including prone positioning); use of sedatives, vasopressors and inotropes; daily cumulative fluid balances; development of kidney injury; ventilator–free days and alive at day 28 (VFD–28), duration of ICU and hospital stay, and ICU, hospital and 90–day mortality.

### **Nature and extent of the burden and risks associated with participation, benefit and group relatedness**

Retrospective collection of data regarding ventilation management and major clinical endpoints is without risk for the individual patient.

# 1. INTRODUCTION AND RATIONALE

## 1.1 The coronavirus disease 2019

Coronavirus disease 2019 (COVID-19) is a lower respiratory tract infection caused by the severe acute respiratory coronavirus-2 (SARS-CoV-2), of which the first outbreak was reported in Wuhan, China in the beginning of December, 2019. Since then, it has rapidly spread across the globe, with over 60.000 new cases each day as of late March 2020.

Although most people who are infected by SARS-CoV-2 only develop mild symptoms, an estimated 5% of reported cases are admitted to the intensive care unit (ICU) because of severe hypoxemia and dyspnoea [1]. The majority of these patients have shown to require invasive ventilation, and in this group, the mortality is considerable [2].

## 1.2 Lung protective ventilation

Although invasive ventilation can be a necessary supportive strategy in patients with respiratory failure, it also has the potential to worsen pre-existing lung injury or even initiate it [3]. 'Ventilator-induced lung injury' (VILI) is mainly due to overdistension of the lungs, and is associated with a longer duration of ventilation and a higher mortality [4]. Lung protective ventilation, featuring low tidal volume ( $V_T$ ), reduced inspiratory plateau pressure ( $P_{\text{plateau}}$ ) [5] and low driving pressure (DP) [6] has been suggested to reduce the risk of mortality and is considered the standard of care ([7-10]. The benefit of high positive end-expiratory pressure (PEEP) remains uncertain, as does the use of recruitment maneuvers. There is evidence that high PEEP with recruitment maneuvers harms patients with ARDS [11]. It is highly uncertain whether high PEEP with recruitment maneuvers benefits COVID-19 patients.

## 1.3 Need for an observational study on ventilator settings

Due to the rapid spread of COVID-19, ICUs worldwide are being overloaded with patients requiring invasive ventilation and healthcare workers are struggling to provide the best care. Approaches in clinical care are already known to vary widely between countries and regions, including the way invasive ventilation is applied [12-15]. It is probable that these variances are amplified by a lack of consensus in treatment due to the novelty of COVID-19. Because invasive ventilation of itself has a strong potential to cause lung damage, these variances could be associated with a difference in patient-centered outcomes, like duration of ventilation and mortality.

Therefore, it is of the utmost importance to observe ventilation strategies that are currently being applied in the treatment of COVID-19 patients. To make haste in this time of crisis, we propose a national, observational, retrospective study that is focused on the inventory of ventilation parameters. This study will form an important first step in creating standard guidelines for invasive ventilation of COVID-19 patients. Implementation of standard guidelines could reduce mortality worldwide.

## **2. OBJECTIVES AND HYPOTHESIS**

### **2.1 Objectives**

#### **2.1.1 Primary objective**

To determine and compare invasive ventilation settings and parameters in COVID–19 patients in intensive care units (ICU) of hospitals in the Netherlands.

#### **2.1.2 Secondary objective**

To determine whether certain ventilation settings have an independent association with duration of ventilation.

### **2.2 Hypothesis**

#### **2.2.1 Primary hypothesis**

There is substantial variation in ventilation practices in COVID–19 patients admitted to the ICU's of hospitals in the Netherlands.

#### **2.2.2 Secondary hypothesis**

Certain ventilation settings impact duration of ventilation.

### **3. STUDY DESIGN**

Multicenter, national, retrospective, observational study in COVID–19 patients with respiratory failure, requiring invasive ventilation in intensive care unit (ICU) settings in hospitals in the Netherlands.

## **4. STUDY POPULATION**

### **4.1 Population (base)**

The data of at least 1,000 consecutively invasively ventilated COVID–19 patients admitted to intensive care units (ICUs) of hospitals in the Netherlands. This study will not be restricted to the ‘formal’ ICUs, as patients may also receive invasive ventilation at other locations within the hospital during the COVID–19 pandemic.

### **4.2 Inclusion criteria**

- COVID–19, confirmed with PCR and/or presence of typical abnormalities on chest computer tomography (CT)
- Suspected COVID–19 infection, with no exclusion of diagnosis
- Having received invasive ventilation

### **4.3 Exclusion criteria**

- Age <18 years
- Already included in the same study in another hospital
- Having had received invasive ventilation > 24 hours in a non–participating hospital

### **4.4 Sample size calculation**

No formal sample size calculation is needed. We expect to capture at least 1,000 patients, but will continue collecting data of new patients for at least 8 weeks.

## 5. METHODS

### 5.1 Study parameters/endpoints

#### 5.1.1 Main study parameters

- Ventilation mode;
- Tidal volume set ( $V_T$ ) (mL);
- Expiratory tidal volume (VTE)
- Positive end–expiratory pressure (PEEP) (cm H<sub>2</sub>O);
- Maximum airway pressure ( $P_{max}$ ) (cm H<sub>2</sub>O) or plateau pressure ( $P_{plateau}$ ) or peak pressure ( $P_{peak}$ ) (cm H<sub>2</sub>O);
- Level of pressure support above PEEP (cm H<sub>2</sub>O);
- Inspired fraction of oxygen (FiO<sub>2</sub>) (%);
- Set and measured respiratory rate (RR) (min<sup>-1</sup>); and
- Inspiration to expiration ratio (I:E) (ratio).

#### 5.1.2 Secondary study parameters

- Number of ventilation–free days and alive at day 28 (VFD–28);
- Duration of ventilation in survivors;
- Use of prone positioning;
- Use of recruitment maneuvers;
- Incidence of acute kidney injury (AKI);
- Duration of ICU stay;
- Duration of hospital stay;
- ICU mortality;
- Hospital mortality;
- 28-day mortality; and
- 90-day mortality.

### 5.2 Randomisation, blinding and treatment allocation

Not applicable.

### 5.3 Study procedures

Patients will be included by the attending clinician. Participating centers will be visited by researchers to collect data of included patients.

### 5.4 Data collection

#### 5.4.1 Demographic data

- Age (age categories);
- Gender (male or female);
- Height (cm);
- Weight (kg);
- Medication (categories); and
- Comorbidities (categories).

#### 5.4.2 Data on day of intubation OR admission to ICU if transferred from another hospital with mechanical ventilation

- Date of hospital admission;
- Date of ICU admission;
- Date and time of intubation (if possible, also in transferred patients);
- Transferred under ventilation (if applicable) (yes or no);
- Duration of ventilation in previous hospital (if applicable) (days);
- Use of non-invasive ventilation (NIV) before intubation (yes or no) and if so, duration (hours);
- Acute Physiology and Chronic Health (APACHE) II score or APACHE IV score, or Simplified Acute Physiology Score (SAPS) II;
- Sequential Organ Failure Scores (SOFA); and
- Plasma creatinine in 24 hours before admission/intubation (mmol/L)

#### 5.4.3 Repeated measures

- Within one hour after initiation of ventilation OR within first hour of arrival when the patient has been intubated in another hospital, AND 3 times a day at fixed time points (8:00 AM, and 4:00 PM and 8:00 PM) for a following 3-day period:
  - Ventilation data
    - Ventilation mode;

- Tidal volume set ( $V_T$ ) (mL);
- Expiratory tidal volume (VTE);
- Positive end–expiratory pressure (PEEP) (cm H<sub>2</sub>O);
- Maximum airway pressure ( $P_{max}$ ) (cm H<sub>2</sub>O) or plateau pressure ( $P_{plateau}$ ) or peak pressure ( $P_{peak}$ ) (cm H<sub>2</sub>O);
- Level of pressure support above PEEP (cm H<sub>2</sub>O);
- Inspired fraction of oxygen (FiO<sub>2</sub>) (%);
- Set an measured respiratory rate (RR) (min<sup>-1</sup>);
- Inspiration to expiration ratio (I:E) (ratio);
- Saturation of peripheral oxygen (SpO<sub>2</sub>) (%); and
- End-tidal carbondioxide (E<sub>T</sub>CO<sub>2</sub>) (kPa).
- Arterial blood gas (ABG) analysis
  - pH;
  - Partial pressure of oxygen (PaO<sub>2</sub>) (kPa or mmHg);
  - Partial pressure of carbon dioxide (PaCO<sub>2</sub>) (kPa or mm Hg);
  - Bicarbonate (HCO<sub>3</sub><sup>-</sup>) (mmol/L);
  - Arterial saturation of oxygen (SaO<sub>2</sub>) (%);
  - Arterial lactate levels (mmol/L);
  - FiO<sub>2</sub> (%) at time point of ABG; and
  - Position of patient in which ABG was taken.
- Hemodynamics
  - Mean arterial pressure (mmHg);
  - Heart rate (bpm);
- 3 times a day at fixed time points (8:00 AM, and 4:00 PM and 8:00 PM) for a following 3-day period:
  - Received paralytic drugs within the previous 8 hours (yes or no).
- Every day at 8:00 AM for 72–hour period after admission
  - Life status (alive or deceased);
  - Location (in ICU, hospital or other facility);
  - Intubation status;
  - Sequential Organ Failure Scores (SOFA);
  - Cumulative dose of sedatives (mg);
  - Cumulative dose of vasopressors (mg);
  - Cumulative fluid balance during last 24 hours (ml);
  - Amount of fluid administered during last 24 hours (ml);
  - Urine output (ml/hour); and
  - Plasma creatinine (mmol/L).
  - Prone position (yes or no), and if yes, time and duration (hours);
  - ABG in supine position;
  - Use of recruitment maneuver (yes or no);
  - Undergoing veno–venous, veno–arterial or arterio–venous extracorporeal membrane oxygenation (ECMO) (yes or no);
  - Pneumothorax (yes or no)
- Follow-up
  - Life status at day 7, day 28 and day 90;
  - Alive (yes or no), and if not, the date of passing;
  - Location (ICU, hospital, home);
  - Intubated (yes or no), and if not, extubation date;
  - Acute Kidney Injury (yes or no);
  - Date of discharge from ICU; and
  - Date of discharge from hospital.

### **5.5 Withdrawal of individual subjects**

Not applicable.

### **5.6 Replacement of individual subjects after withdrawal**

Not applicable.

### **5.7 Follow-up of subjects withdrawn from treatment**

Not applicable.

## **5.8 Premature termination of the study**

Not applicable.



## **6. SAFETY REPORTING**

### **6.1 Temporary halt for reasons of subject safety**

Not applicable.

### **6.2 Serious adverse events (SAEs)**

Not applicable.

### **6.3 Follow-up of adverse events**

Not applicable.

### **6.4 Data Safety Monitoring Board (DSMB)**

Not applicable.

## 7. STATISTICAL ANALYSIS

Descriptive statistics will be used to describe the study population, and data are expressed in number and relative proportions for categorical variables and median (quartile 25% – quartile 75%) for continuous variables.

As the outcome of this study is urgently needed, data analysis will be done in two sequential steps. The first step includes an analysis of all patients admitted for invasive ventilation in one of the participating ICUs in the first four weeks after admission of the first COVID–19 patients, which was in all centers within the first weeks of March 2020. This part of the analysis focusses on ventilation practices in the first weeks of the pandemic in the Netherlands. This analysis may underestimate the effect of ventilation variables and parameters on outcomes, as many patients will not yet be weaned from the ventilator and remain admitted in the ICU. The second step includes an analysis of all COVID–19 patients admitted during the total 10 weeks PROVENT COVID will enroll patients, with a complete follow up till day 90. This analysis will provide an answer to the question whether certain ventilator settings, variables and parameters are associated with patient–centered and other important outcomes.

All analyses will be performed using multilevel (patients nested in hospitals), mixed modelling with hospitals as random effect. Ventilatory variables and parameters will be compared among the groups, and absolute differences with the respective 95%–confidence interval (CI) will be calculated as the absolute difference from a mixed–effect linear model considering the hospitals as random effect to account for within–center clustering. Categorical variables will be compared as the risk difference from the same model.

Cumulative distribution plots will be used to demonstrate the cumulative distribution frequency of ventilation variables. Vertical dotted lines will represent the cut–off for each variable and the horizontal dotted lines the respective proportion of patients reaching each cut–off. Cut–offs to form matrices may use widely accepted values for each variable, specifically 8 mL/kg PBW for tidal volume, 10 cm H<sub>2</sub>O for PEEP, 30 cm H<sub>2</sub>O for plateau pressure, and 15 cm H<sub>2</sub>O for  $\Delta P$ .

Mixed–effect multivariable logistic or linear regression model will be used to identify factors independently associated with major outcomes, like death and VFD–28. Subanalyses are planned to investigate differences in ventilation practice and outcomes in the following prespecified subgroups: women versus men, and patients categorized by the body mass index.

All analyses will be conducted in R v.3.6.0 and a p value < 0.05 will be considered statistically significant.

## **8. ETHICAL CONSIDERATIONS**

### **8.1 Regulation statement**

This study will be conducted according to the principles of the Declaration of Helsinki (revision Fortaleza, Brazil, October 2013).

### **8.2 Recruitment and consent**

Since the proposed study concerns a service review, no research related interventions will take place. Therefore, no ethical concerns exist. As pseudo–anonymous data, which can no longer be attributed to a specific data subject will be used, there is no concern for informed consent.

### **8.3 Benefits and risks assessment, group relatedness**

This study does not result in any risk or burdens to patients.

### **8.4 Compensation for injury**

Not applicable.

## **9. ADMINISTRATIVE ASPECTS, MONITORING AND PUBLICATION**

### **9.1 Handling and storage of data and documents**

Subject data will be stored a pseudo-anonymized, which means that relating the individual data to identifiable patients would require disproportional effort. Used data as written in the case report form will not contain any identifiable or relatable data. All handling of personal data will comply with the General Data Protection Regulation and the 'Reuse of care data for the purpose of research' standard of the AMC.

### **9.2 Monitoring and Quality Assurance**

Not applicable.

### **9.3 Amendments**

Not applicable.

### **9.4 Annual progress report**

Not applicable.

### **9.5 Temporary halt and (prematurely) end of study report**

Not applicable.

### **9.6 Public disclosure and publication policy**

Not applicable.

## 10. REFERENCES

1. Guan, W.J., et al., Clinical Characteristics of Coronavirus Disease 2019 in China. *N Engl J Med*, 2020.
2. Yang, X., et al., Clinical course and outcomes of critically ill patients with SARS-CoV-2 pneumonia in Wuhan, China: a single-centered, retrospective, observational study. *Lancet Respir Med*, 2020.
3. Slutsky, A.S. and V.M. Ranieri, Ventilator-induced lung injury. *N Engl J Med*, 2014. **370**(10): p. 980.
4. Acute Respiratory Distress Syndrome, N., et al., Ventilation with lower tidal volumes as compared with traditional tidal volumes for acute lung injury and the acute respiratory distress syndrome. *N Engl J Med*, 2000. **342**(18): p. 1301-8.
5. Fan, E., et al., An Official American Thoracic Society/European Society of Intensive Care Medicine/Society of Critical Care Medicine Clinical Practice Guideline: Mechanical Ventilation in Adult Patients with Acute Respiratory Distress Syndrome. *Am J Respir Crit Care Med*, 2017. **195**(9): p. 1253-1263.
6. Amato, M.B., et al., Driving pressure and survival in the acute respiratory distress syndrome. *N Engl J Med*, 2015. **372**(8): p. 747-55.
7. Esteban, A., et al., Evolution of mechanical ventilation in response to clinical research. *Am J Respir Crit Care Med*, 2008. **177**(2): p. 170-7.
8. Esteban, A., et al., Evolution of mortality over time in patients receiving mechanical ventilation. *Am J Respir Crit Care Med*, 2013. **188**(2): p. 220-30.
9. Matthay, M.A., L.B. Ware, and G.A. Zimmerman, The acute respiratory distress syndrome. *J Clin Invest*, 2012. **122**(8): p. 2731-40.
10. Needham, D.M., et al., Lung protective mechanical ventilation and two year survival in patients with acute lung injury: prospective cohort study. *BMJ*, 2012. **344**: p. e2124.
11. Writing Group for the Alveolar Recruitment for Acute Respiratory Distress Syndrome Trial, I., et al., Effect of Lung Recruitment and Titrated Positive End-Expiratory Pressure (PEEP) vs Low PEEP on Mortality in Patients With Acute Respiratory Distress Syndrome: A Randomized Clinical Trial. *JAMA*, 2017. **318**(14): p. 1335-1345.
12. Bellani, G., et al., Epidemiology, Patterns of Care, and Mortality for Patients With Acute Respiratory Distress Syndrome in Intensive Care Units in 50 Countries. *JAMA*, 2016. **315**(8): p. 788-800.
13. Laffey, J.G., et al., Potentially modifiable factors contributing to outcome from acute respiratory distress syndrome: the LUNG SAFE study. *Intensive Care Med*, 2016. **42**(12): p. 1865-1876.
14. de Graaff, A.E., et al., Clinicians' response to hyperoxia in ventilated patients in a Dutch ICU depends on the level of FiO<sub>2</sub>. *Intensive Care Med*, 2011. **37**(1): p. 46-51.
15. Simonis, F.D., et al., Potentially modifiable respiratory variables contributing to outcome in ICU patients without ARDS: a secondary analysis of PROVENT. *Ann Intensive Care*, 2018. **8**(1): p. 39.

**Appendix Table 1 - Linearity Assumption Assessed Using the Box-Tidwell Power Transformation for the Full Model of 28-Day Mortality**

|                                                      | 28-Day Mortality |
|------------------------------------------------------|------------------|
|                                                      | <i>p</i> value   |
| Ventilatory variables at the first day*              |                  |
| PEEP, cmH <sub>2</sub> O                             | 0.49             |
| Tidal volume, mL/kg PBW                              | 0.53             |
| Respiratory system compliance, mL/cmH <sub>2</sub> O | 0.22             |
| Oxygenation variables at the first day*              |                  |
| PaO <sub>2</sub> / FiO <sub>2</sub>                  | 0.013            |
| Laboratory tests at the first day*                   |                  |
| pH                                                   | 0.14             |
| Lactate, mmol/L                                      | 0.07             |
| Creatinine, μmol/L                                   | 0.66             |
| Vital signs at the first day*                        |                  |
| Heart rate, bpm                                      | 0.60             |
| Mean arterial pressure, mmHg                         | 0.60             |
| Baseline characteristics                             |                  |
| Age, years                                           | 0.72             |
| Body mass index, kg/m <sup>2</sup>                   | 0.25             |

Fluid balance was not assessed because the Box-Tidwell test does not accept negative values. The linearity assumption for fluid balance was confirmed in a scatter plot of the predictor against the logit.

**Appendix Table 2 – Amount of missing data**

|                                         | <b>Overall<br/>(n = 553)</b> |
|-----------------------------------------|------------------------------|
| Age                                     | 0 (0.0)                      |
| Gender                                  | 0 (0.0)                      |
| Body mass index                         | 7 (1.3)                      |
| Transferred intubated                   | 0 (0.0)                      |
| Use of non-invasive ventilation         | 64 (11.6)                    |
| Chest CT scan performed                 | 0 (0.0)                      |
| Chest X-ray performed                   | 185 (33.5)                   |
| Pneumothorax at baseline                | 424 (76.7)                   |
| SAPS II                                 | 355 (64.2)                   |
| APACHE II                               | 407 (73.6)                   |
| APACHE IV                               | 282 (51.0)                   |
| SOFA                                    | 300 (54.2)                   |
| Severity ARDS                           | 12 (2.2)                     |
| Hypertension                            | 0 (0.0)                      |
| Heart failure                           | 0 (0.0)                      |
| Diabetes                                | 0 (0.0)                      |
| Chronic kidney disease                  | 0 (0.0)                      |
| Baseline creatinine                     | 14 (2.5)                     |
| Liver cirrhosis                         | 0 (0.0)                      |
| Chronic obstructive pulmonary disease   | 0 (0.0)                      |
| Active hematological neoplasia          | 0 (0.0)                      |
| Active solid neoplasia                  | 0 (0.0)                      |
| Neuromuscular disease                   | 0 (0.0)                      |
| Immunosuppression                       | 0 (0.0)                      |
| Systemic steroids                       | 0 (0.0)                      |
| Inhaled steroids                        | 0 (0.0)                      |
| Angiotensin converting enzyme inhibitor | 0 (0.0)                      |
| Angiotensin II receptor blocker         | 0 (0.0)                      |
| Beta-blockers                           | 0 (0.0)                      |
| Insulin                                 | 0 (0.0)                      |
| Metformin                               | 0 (0.0)                      |
| Statins                                 | 0 (0.0)                      |
| Calcium channel blockers                | 0 (0.0)                      |
| Continuous sedation                     | 2 (0.4)                      |
| Vasopressor                             | 2 (0.4)                      |
| Fluid balance                           | 6 (1.1)                      |
| Urine output                            | 10 (1.8)                     |
| Mode of ventilation                     | 2 (0.4)                      |
| Tidal volume                            | 22 (4.0)                     |
| PEEP                                    | 2 (0.4)                      |
| Peak pressure                           | 48 (8.7)                     |
| Driving pressure                        | 49 (8.8)                     |
| Compliance                              | 63 (11.4)                    |
| Total respiratory rate                  | 12 (2.2)                     |
| FiO <sub>2</sub>                        | 3 (0.5)                      |
| SpO <sub>2</sub> / FiO <sub>2</sub>     | 3 (0.5)                      |
| etCO <sub>2</sub>                       | 31 (5.6)                     |
| Mean arterial pressure                  | 1 (0.2)                      |
| Heart rate                              | 0 (0.0)                      |

**Appendix Table 2 – Amount of missing data**

|                                     | <b>Overall<br/>(n = 553)</b> |
|-------------------------------------|------------------------------|
| pH                                  | 2 (0.4)                      |
| PaO <sub>2</sub>                    | 2 (0.4)                      |
| PaO <sub>2</sub> / FiO <sub>2</sub> | 5 (0.9)                      |
| PaCO <sub>2</sub> , mmHg            | 2 (0.4)                      |
| Lactate, mmol/L                     | 24 (4.3)                     |
| Use of neuromuscular blockade       | 21 (3.8)                     |
| Prone positioning                   | 9 (1.6)                      |
| Recruitment maneuver                | 109 (19.7)                   |
| ECMO                                | 8 (1.4)                      |
| Ventilator-free days at day 28      | 48 (8.7)                     |
| Successful extubation               | 0 (0.0)                      |
| Duration of ventilation             | 72 (13.0)                    |
| Tracheostomy                        | 0 (0.0)                      |
| Reintubation                        | 7 (1.3)                      |
| Pneumothorax                        | 11 (2.0)                     |
| Thromboembolic complications        | 1 (0.2)                      |
| Pulmonary embolism                  | 1 (0.2)                      |
| Deep vein thrombosis                | 1 (0.2)                      |
| Ischemic stroke                     | 1 (0.2)                      |
| Myocardial infarction               | 1 (0.2)                      |
| Systemic arterial embolism          | 1 (0.2)                      |
| Acute kidney injury                 | 0 (0.0)                      |
| Need for renal replacement therapy  | 1 (0.2)                      |
| ICU length of stay                  | 138 (25.0)                   |
| Hospital length of stay             | 107 (19.3)                   |
| ICU mortality                       | 51 (9.2)                     |
| Hospital mortality                  | 317 (57.3)                   |
| 7-Day mortality                     | 20 (3.6)                     |
| 28-Day mortality                    | 23 (4.2)                     |

SAPS: Simplified Acute Physiology Score; APACHE: Acute Physiology And Chronic Health Evaluation; SOFA: Sequential Organ Failure Assessment; ARDS: Acute Respiratory Distress Syndrome; PEEP: positive end-expiratory pressure; FiO<sub>2</sub>: inspired fraction of oxygen; ECMO: extracorporeal membrane oxygenation; ICU: Intensive Care Unit



**Appendix Table 3 – Characteristics of Advanced Life Support in the First 4 Days of Ventilation**

|                                                     | Day 00                 | Day 01                  | Day 02                  | Day 03                  |
|-----------------------------------------------------|------------------------|-------------------------|-------------------------|-------------------------|
| <b>Organ support</b>                                |                        |                         |                         |                         |
| SOFA                                                | 8.0 (6.0 – 11.0)       | 7.0 (6.0 – 10.0)        | 7.0 (6.0 – 11.0)        | 7.0 (6.0 – 11.0)        |
| Continuous sedation – no (%)                        | 532 (96.6)             | 521 (94.2)              | 481 (87.0)              | 448 (81.2)              |
| Vasopressor – no (%)                                | 430 (78.0)             | 465 (84.1)              | 409 (74.0)              | 354 (64.1)              |
| Fluid balance, mL                                   | 584.0 (32.7 – 1327.5)  | 1552.0 (798.9 – 2300.5) | 1154.7 (398.8 – 1883.5) | 673.5 (-80.5 – 1562.5)  |
| Urine output, mL                                    | 635.0 (335.0 – 1130.0) | 1110.0 (766.2 – 1607.5) | 1255.0 (845.0 – 1816.2) | 1420.0 (950.0 – 2110.0) |
| <b>Ventilation support</b>                          |                        |                         |                         |                         |
| Mode of ventilation – no (%)                        |                        |                         |                         |                         |
| Volume-controlled                                   | 104 (18.8)             | 75 (14.1)               | 59 (11.9)               | 54 (11.4)               |
| Pressure-controlled                                 | 277 (50.2)             | 241 (45.3)              | 206 (41.5)              | 178 (37.6)              |
| Pressure-support                                    | 25 (4.5)               | 81 (15.2)               | 107 (21.6)              | 127 (26.8)              |
| SIMV                                                | 36 (6.5)               | 39 (7.3)                | 35 (7.1)                | 34 (7.2)                |
| APRV                                                | 21 (3.8)               | 26 (4.9)                | 17 (3.4)                | 15 (3.2)                |
| INTELLiVENT-ASV                                     | 32 (5.8)               | 23 (4.3)                | 28 (5.6)                | 24 (5.1)                |
| Other                                               | 57 (10.3)              | 47 (8.8)                | 44 (8.9)                | 41 (8.7)                |
| Tidal volume, mL/kg PBW                             | 6.5 (5.9 – 7.1)        | 6.5 (6.0 – 7.3)         | 6.6 (6.0 – 7.3)         | 6.6 (6.0 – 7.3)         |
| PEEP, cmH <sub>2</sub> O                            | 13.6 (12.0 – 15.0)     | 14.0 (11.7 – 15.0)      | 13.7 (11.3 – 15.0)      | 13.3 (10.9 – 15.3)      |
| Peak pressure, cmH <sub>2</sub> O                   | 27.0 (24.0 – 30.0)     | 26.5 (23.0 – 29.7)      | 26.3 (23.0 – 29.7)      | 26.7 (22.7 – 30.3)      |
| Driving pressure, cmH <sub>2</sub> O                | 13.5 (11.5 – 16.0)     | 12.7 (10.5 – 15.7)      | 13.0 (10.7 – 16.0)      | 13.3 (11.0 – 16.0)      |
| Mechanical power, J/min                             | 19.0 (15.4 – 23.0)     | 19.5 (15.3 – 24.0)      | 20.2 (15.6 – 24.8)      | 20.5 (16.3 – 25.3)      |
| Compliance, mL/cmH <sub>2</sub> O                   | 33.7 (28.0 – 42.5)     | 36.5 (29.0 – 46.4)      | 35.6 (28.5 – 47.3)      | 35.1 (28.2 – 46.6)      |
| Total respiratory rate, mpm                         | 21.7 (19.5 – 24.0)     | 22.0 (19.7 – 25.3)      | 23.3 (20.0 – 26.2)      | 24.0 (20.7 – 26.7)      |
| FiO <sub>2</sub>                                    | 0.56 (0.47 – 0.65)     | 0.43 (0.39 – 0.52)      | 0.43 (0.38 – 0.50)      | 0.45 (0.40 – 0.53)      |
| SpO <sub>2</sub> / FiO <sub>2</sub>                 | 177.7 (151.3 – 211.2)  | 222.2 (186.5 – 248.6)   | 220.0 (185.3 – 250.4)   | 209.6 (179.7 – 243.8)   |
| etCO <sub>2</sub> , mmHg                            | 36.8 (32.6 – 42.4)     | 37.8 (33.2 – 43.0)      | 38.5 (33.7 – 43.4)      | 38.8 (33.9 – 44.8)      |
| <b>Vital signs</b>                                  |                        |                         |                         |                         |
| Mean arterial pressure, mmHg                        | 79.8 (73.5 – 88.0)     | 76.0 (71.2 – 81.7)      | 77.3 (72.3 – 83.3)      | 78.0 (73.0 – 84.1)      |
| Heart rate, bpm                                     | 82.0 (72.0 – 94.7)     | 80.0 (69.2 – 93.3)      | 82.7 (70.3 – 96.1)      | 85.0 (74.2 – 97.3)      |
| <b>Laboratory tests</b>                             |                        |                         |                         |                         |
| pH                                                  | 7.36 (7.31 – 7.41)     | 7.37 (7.31 – 7.41)      | 7.36 (7.31 – 7.41)      | 7.38 (7.32 – 7.42)      |
| PaO <sub>2</sub> / FiO <sub>2</sub>                 | 158.8 (128.6 – 200.5)  | 182.1 (148.5 – 214.2)   | 175.6 (143.1 – 206.1)   | 166.5 (135.5 – 199.5)   |
| PaCO <sub>2</sub> , mmHg                            | 44.3 (39.0 – 50.6)     | 45.5 (40.8 – 51.3)      | 47.7 (42.8 – 54.8)      | 49.1 (44.0 – 55.6)      |
| Lactate, mmol/L                                     | 1.1 (0.9 – 1.4)        | 1.2 (1.0 – 1.5)         | 1.3 (1.0 – 1.6)         | 1.3 (1.0 – 1.6)         |
| Creatinine, µmol/L                                  | 74.0 (62.0 – 98.0)     | 85.0 (66.0 – 125.8)     | 88.0 (66.0 – 141.5)     | 86.0 (66.0 – 138.0)     |
| <b>Rescue therapy – no (%)</b>                      |                        |                         |                         |                         |
| Use of neuromuscular blockade                       | 126 (23.7)             | 182 (35.0)              | 183 (37.6)              | 144 (31.9)              |
| Hours of use of neuromuscular blockade <sup>a</sup> | 8.0 (8.0 – 16.0)       | 16.0 (16.0 – 24.0)      | 24.0 (16.0 – 24.0)      | 20.0 (8.0 – 24.0)       |
| Prone positioning                                   | 135 (24.8)             | 208 (39.3)              | 192 (38.4)              | 184 (38.8)              |
| Duration of prone positioning, hours <sup>a</sup>   | 8.0 (4.0 – 12.0)       | 14.0 (10.0 – 19.0)      | 14.0 (10.0 – 19.1)      | 14.0 (11.0 – 19.2)      |
| Recruitment manoeuvre                               | 5 (1.1)                | 13 (3.1)                | 10 (2.5)                | 7 (1.8)                 |
| ECMO                                                | 1 (0.2)                | 1 (0.2)                 | 2 (0.4)                 | 2 (0.4)                 |

Data are median (quartile 25% - quartile 75%) or No (%). Percentages may not total 100 because of rounding

APRV: airway pressure release ventilation; ASV: adaptive support ventilation; ECMO: extracorporeal membrane oxygenation; FiO<sub>2</sub>: inspired fraction of oxygen; PEEP: positive end-expiratory pressure; SIMV: synchronized intermittent mandatory ventilation

<sup>a</sup> In patients who received it

**Appendix Table 4 - Full Multivariable Model Assessing Predictors of 28-Day Mortality**

|                                                      | Odds Ratio<br>(95% CI) | p value  |
|------------------------------------------------------|------------------------|----------|
| Ventilatory variables at the first day*              |                        |          |
| PEEP, cmH <sub>2</sub> O                             | 1.08 (0.85 to 1.39)    | 0.51     |
| Tidal volume, mL/kg PBW                              | 1.28 (1.00 to 1.64)    | 0.049    |
| Respiratory system compliance, mL/cmH <sub>2</sub> O | 0.75 (0.57 to 0.98)    | 0.037    |
| Oxygenation variables at the first day*              |                        |          |
| PaO <sub>2</sub> / FiO <sub>2</sub>                  | 0.98 (0.95 to 1.01)    | 0.11     |
| PaO <sub>2</sub> / FiO <sub>2</sub> '                | 1.24 (1.00 to 1.54)    | 0.053    |
| PaO <sub>2</sub> / FiO <sub>2</sub> "                | 0.38 (0.16 to 0.88)    | 0.025    |
| PaO <sub>2</sub> / FiO <sub>2</sub> '''              | 3.86 (1.34 to 11.08)   | 0.012    |
| Laboratory tests at the first day*                   |                        |          |
| pH                                                   | 0.71 (0.55 to 0.93)    | 0.012    |
| Lactate, mmol/L                                      | 1.12 (0.88 to 1.43)    | 0.37     |
| Creatinine, μmol/L                                   | 1.04 (0.82 to 1.32)    | 0.76     |
| Vital signs at the first day*                        |                        |          |
| Heart rate, bpm                                      | 1.02 (1.00 to 1.03)    | 0.013    |
| Mean arterial pressure, mmHg                         | 0.99 (0.96 to 1.02)    | 0.46     |
| Organ support at the first day                       |                        |          |
| Use of vasopressor                                   | 2.07 (0.76 to 5.66)    | 0.16     |
| Fluid balance, mL                                    | 1.07 (0.85 to 1.36)    | 0.55     |
| Baseline characteristics                             |                        |          |
| Age, years                                           | 2.19 (1.65 to 2.90)    | < 0.0001 |
| Male gender                                          | 2.16 (1.24 to 3.78)    | 0.007    |
| Body mass index, kg/m <sup>2</sup>                   | 0.85 (0.66 to 1.09)    | 0.19     |
| Hypertension                                         | 1.16 (0.72 to 1.88)    | 0.54     |
| Heart failure                                        | 0.73 (0.26 to 2.08)    | 0.56     |
| Diabetes                                             | 1.58 (0.93 to 2.67)    | 0.09     |
| Chronic kidney disease                               | 0.89 (0.30 to 2.61)    | 0.83     |
| Chronic obstructive pulmonary disease                | 1.70 (0.86 to 3.36)    | 0.13     |
| Use of angiotensin converting enzyme inhibitor       | 0.85 (0.47 to 1.53)    | 0.59     |
| Use of angiotensin II receptor blocker               | 0.60 (0.30 to 1.21)    | 0.15     |

\* median value from a maximum of six assessments during the first 24 hours

PaO<sub>2</sub> / FiO<sub>2</sub> were modelled non-linearly with restrict cubic splines according to evidence obtained from the data

All models are mixed-effect models with centers as random effect and considering a binomial distribution

All continuous variables were entered after standardization to improve convergence of the model, and odds ratio represent the increase in one standard deviation of the variable.

**Appendix Table 5 - Full Multivariable Model Assessing Predictors of VFD-28**

|                                                         | Mean Difference<br>(95% CI) | p value  |
|---------------------------------------------------------|-----------------------------|----------|
| Ventilatory variables at the first day*                 |                             |          |
| PEEP, cmH <sub>2</sub> O                                | -0.73 (-1.52 to 0.06)       | 0.07     |
| Tidal volume, mL/kg PBW                                 | -0.35 (-1.15 to 0.45)       | 0.39     |
| Respiratory system compliance, mL/cmH <sub>2</sub> O    | 7.16 (1.36 to 12.96)        | 0.016    |
| Respiratory system compliance, mL/cmH <sub>2</sub> O'   | -43.40 (-106.99 to 20.19)   | 0.18     |
| Respiratory system compliance, mL/cmH <sub>2</sub> O''  | 67.61 (-59.13 to 194.35)    | 0.30     |
| Respiratory system compliance, mL/cmH <sub>2</sub> O''' | -30.38 (-100.08 to 39.32)   | 0.39     |
| Oxygenation variables at the first day*                 |                             |          |
| PaO <sub>2</sub> / FiO <sub>2</sub>                     | 1.00 (0.27 to 1.72)         | 0.007    |
| Laboratory tests at the first day*                      |                             |          |
| pH                                                      | 0.81 (-1.14 to 2.76)        | 0.42     |
| pH'                                                     | 0.49 (-7.72 to 8.70)        | 0.91     |
| pH''                                                    | 0.21 (-13.58 to 13.99)      | 0.98     |
| pH'''                                                   | 0.10 (-7.43 to 7.62)        | 0.98     |
| Lactate, mmol/L                                         | 1.01 (-11.33 to 13.35)      | 0.87     |
| Lactate, mmol/L'                                        | -70.52 (-297.23 to 156.20)  | 0.54     |
| Lactate, mmol/L''                                       | 97.03 (-319.33 to 513.39)   | 0.65     |
| Lactate, mmol/L'''                                      | -27.70 (-232.71 to 177.31)  | 0.79     |
| Creatinine, μmol/L                                      | -3.28 (-15.18 to 8.61)      | 0.59     |
| Creatinine, μmol/L'                                     | 25.88 (-267.31 to 319.07)   | 0.86     |
| Creatinine, μmol/L''                                    | -36.77 (-550.66 to 477.12)  | 0.89     |
| Creatinine, μmol/L'''                                   | 14.25 (-220.85 to 249.35)   | 0.90     |
| Vital signs at the first day*                           |                             |          |
| Heart rate, bpm                                         | -0.62 (-1.36 to 0.11)       | 0.10     |
| Mean arterial pressure, mmHg                            | 0.06 (-3.62 to 3.74)        | 0.97     |
| Mean arterial pressure, mmHg'                           | -2.30 (-27.22 to 22.63)     | 0.86     |
| Mean arterial pressure, mmHg''                          | 10.59 (-34.00 to 55.18)     | 0.64     |
| Mean arterial pressure, mmHg'''                         | -8.08 (-31.60 to 15.43)     | 0.50     |
| Organ support at the first day                          |                             |          |
| Use of vasopressor                                      | 0.80 (-1.80 to 3.40)        | 0.54     |
| Fluid balance, mL                                       | -0.24 (-1.01 to 0.53)       | 0.55     |
| Baseline characteristics                                |                             |          |
| Age, years                                              | -2.13 (-2.90 to -1.35)      | < 0.0001 |
| Male gender                                             | -2.38 (-4.24 to -0.52)      | 0.013    |
| Body mass index, kg/m <sup>2</sup>                      | 0.51 (-0.24 to 1.26)        | 0.18     |
| Hypertension                                            | -0.01 (-1.58 to 1.57)       | 0.99     |
| Heart failure                                           | 1.22 (-2.03 to 4.46)        | 0.46     |
| Diabetes                                                | -1.12 (-2.88 to 0.64)       | 0.21     |
| Chronic kidney disease                                  | -0.53 (-4.17 to 3.10)       | 0.77     |
| Chronic obstructive pulmonary disease                   | -0.71 (-3.00 to 1.58)       | 0.54     |
| Use of angiotensin converting enzyme inhibitor          | 2.75 (0.86 to 4.63)         | 0.004    |
| Use of angiotensin II receptor blocker                  | 0.24 (-2.05 to 2.53)        | 0.84     |

\* median value from a maximum of six assessments during the first 24 hours

Respiratory system compliance, pH, lactate, creatinine and mean arterial pressure were modelled non-linearly with restrict cubic splines according to evidence obtained from the data

All models are mixed-effect models with centers as random effect and considering a binomial distribution

All continuous variables were entered after standardization to improve convergence of the model, and the mean difference represents the increase in one standard deviation of the variable.

**Appendix Table 6 - Variance-Inflation Factor for Both Models**

|                                                      | 28-Day Mortality          | VFD at Day 28             |
|------------------------------------------------------|---------------------------|---------------------------|
|                                                      | Variance-Inflation Factor | Variance-Inflation Factor |
| Ventilatory variables at the first day*              |                           |                           |
| PEEP, cmH <sub>2</sub> O                             | 1.186                     | 1.190                     |
| Tidal volume, mL/kg PBW                              | 1.389                     | 1.405                     |
| Respiratory system compliance, mL/cmH <sub>2</sub> O | 1.518                     | 1.495                     |
| Oxygenation variables at the first day*              |                           |                           |
| PaO <sub>2</sub> / FiO <sub>2</sub>                  | 1.119                     | 1.118                     |
| Laboratory tests at the first day*                   |                           |                           |
| pH                                                   | 1.363                     | 1.440                     |
| Lactate, mmol/L                                      | 1.074                     | 1.089                     |
| Creatinine, µmol/L                                   | 1.355                     | 1.397                     |
| Vital signs at the first day*                        |                           |                           |
| Heart rate, bpm                                      | 1.222                     | 1.207                     |
| Mean arterial pressure, mmHg                         | 1.156                     | 1.178                     |
| Organ support at the first day                       |                           |                           |
| Use of vasopressor                                   | 1.060                     | 1.129                     |
| Fluid balance, mL                                    | 1.175                     | 1.227                     |
| Baseline characteristics                             |                           |                           |
| Age, years                                           | 1.204                     | 1.345                     |
| Male gender                                          | 1.292                     | 1.280                     |
| Body mass index, kg/m <sup>2</sup>                   | 1.309                     | 1.312                     |
| Hypertension                                         | 1.273                     | 1.310                     |
| Heart failure                                        | 1.145                     | 1.126                     |
| Diabetes                                             | 1.149                     | 1.154                     |
| Chronic kidney disease                               | 1.201                     | 1.224                     |
| Chronic obstructive pulmonary disease                | 1.053                     | 1.066                     |
| Use of angiotensin converting enzyme inhibitor       | 1.287                     | 1.290                     |
| Use of angiotensin II receptor blocker               | 1.252                     | 1.218                     |

The variance-inflation factor of a variable is a measure for how easily it is predicted from a linear regression using the other predictors. Taking the square root of the VIF tells you how much larger the standard error of the estimated coefficient is respect to the case when that predictor is independent of the other predictors.

A general guideline is that a VIF larger than 5 or 10 is large, indicating that the model has problems estimating the coefficient.

Also, if the VIF is larger than  $1 / (1-R^2)$ , then that predictor is more related to the other predictors than it is to the response. This value is 1.403 for the 28-day mortality model and 1.317

**Appendix Table 7 - Clinical Outcomes According to the Severity of ARDS at Baseline<sup>a</sup>**

|                                      | Mild ARDS<br>(n = 135) | Moderate ARDS<br>(n = 360) | Severe ARDS<br>(n = 46) | p value |
|--------------------------------------|------------------------|----------------------------|-------------------------|---------|
| <b>Ventilatory support</b>           |                        |                            |                         |         |
| Ventilator-free days at day 28, days | 4.0 (0.0 – 16.0)       | 0.0 (0.0 – 15.0)           | 0.0 (0.0 – 8.0)         | 0.019   |
| Mean ± standard deviation            | 8.2 ± 9.1              | 6.5 ± 8.4                  | 4.2 ± 6.7               | 0.019   |
| Successful extubation – no (%)       | 74 / 135 (54.8)        | 166 / 360 (46.1)           | 21 / 46 (45.7)          | 0.22    |
| Duration of ventilation, days        | 13.5 (7.5 – 20.5)      | 13.5 (8.5 – 22.5)          | 14.5 (8.0 – 22.5)       | 0.74    |
| In survivors, days                   | 15.5 (8.5 – 22.2)      | 16.5 (10.5 – 27.5)         | 20.5 (15.0 – 30.5)      | 0.09    |
| Tracheostomy – no (%)                | 25 / 135 (18.5)        | 40 / 360 (11.1)            | 6 / 46 (13.0)           | 0.09    |
| Reintubation – no (%)                | 19 / 133 (14.3)        | 43 / 355 (12.1)            | 6 / 46 (13.0)           | 0.78    |
| Pneumothorax – no (%)                | 4 / 131 (3.1)          | 2 / 353 (0.6)              | 0 / 46 (0.0)            | 0.09    |
| <b>Complications</b>                 |                        |                            |                         |         |
| Thromboembolic complications         | 35 / 135 (25.9)        | 70 / 359 (19.5)            | 10 / 46 (21.7)          | 0.29    |
| Pulmonary embolism*                  | 20 / 135 (14.8)        | 48 / 359 (13.4)            | 6 / 46 (13.0)           | 0.92    |
| Deep vein thrombosis                 | 7 / 135 (5.2)          | 13 / 359 (3.6)             | 3 / 46 (6.5)            | 0.45    |
| Ischemic stroke                      | 6 / 135 (4.4)          | 5 / 359 (1.4)              | 2 / 46 (4.3)            | 0.07    |
| Myocardial infarction                | 4 / 135 (3.0)          | 4 / 359 (1.1)              | 0 / 46 (0.0)            | 0.32    |
| Systemic arterial embolism           | 1 / 135 (0.7)          | 1 / 359 (0.3)              | 1 / 46 (2.2)            | 0.14    |
| Acute kidney injury**                | 59 / 135 (43.7)        | 171 / 360 (47.5)           | 27 / 46 (58.7)          | 0.22    |
| Need for renal replacement therapy   | 19 / 134 (14.2)        | 62 / 360 (17.2)            | 12 / 46 (26.1)          | 0.19    |
| <b>Clinical outcomes</b>             |                        |                            |                         |         |
| ICU length of stay, days             | 13.5 (8.0 – 22.0)      | 15.0 (9.0 – 26.0)          | 13.0 (7.0 – 23.5)       | 0.41    |
| In survivors, days                   | 14.0 (8.0 – 22.0)      | 16.5 (10.0 – 29.8)         | 21.5 (13.2 – 31.8)      | 0.02    |
| Hospital length of stay, days        | 20.0 (11.2 – 30.8)     | 19.0 (11.0 – 30.0)         | 20.0 (10.5 – 35.0)      | 0.99    |
| In survivors, days                   | 23.0 (16.0 – 32.0)     | 27.0 (19.0 – 39.2)         | 35.5 (27.5 – 36.2)      | 0.009   |
| <b>Mortality – no (%)</b>            |                        |                            |                         |         |
| Day 7                                | 15 / 131 (11.5)        | 55 / 345 (15.9)            | 9 / 46 (19.6)           | 0.30    |
| Day 28                               | 40 / 131 (30.5)        | 122 / 343 (35.6)           | 21 / 45 (46.7)          | 0.15    |
| ICU                                  | 38 / 121 (31.4)        | 135 / 327 (41.3)           | 21 / 43 (48.8)          | 0.07    |
| Hospital                             | 43 / 100 (43.0)        | 136 / 283 (48.1)           | 22 / 38 (57.9)          | 0.29    |

Data are median (quartile 25% - quartile 75%) or No (%). Percentages may not total 100 because of rounding

Outcomes assessed until day 28 when not indicated

<sup>a</sup> Baseline PaO<sub>2</sub> / FiO<sub>2</sub> ratio was missing in 12 patients.

\* Pulmonary embolism was defined when confirmed by chest CT angiography or when highly suspicious according to clinical assessment and treated accordingly by the attending physician

\*\* Acute kidney injury was defined when one of the following criteria was met at any point within 28 days after intubation: 1) a 1.5-fold increase of creatinine compared to baseline; and/or 2) an absolute creatinine increase of 26.5 μmol/L compared to baseline; and/or a urinary output <0.5 mL/kg per hour for more than 6 hours.

**Appendix Figure 1 - Correlation Matrix Assessing the Correlation Between Continuous Predictors Considered for the Multivariable Models**

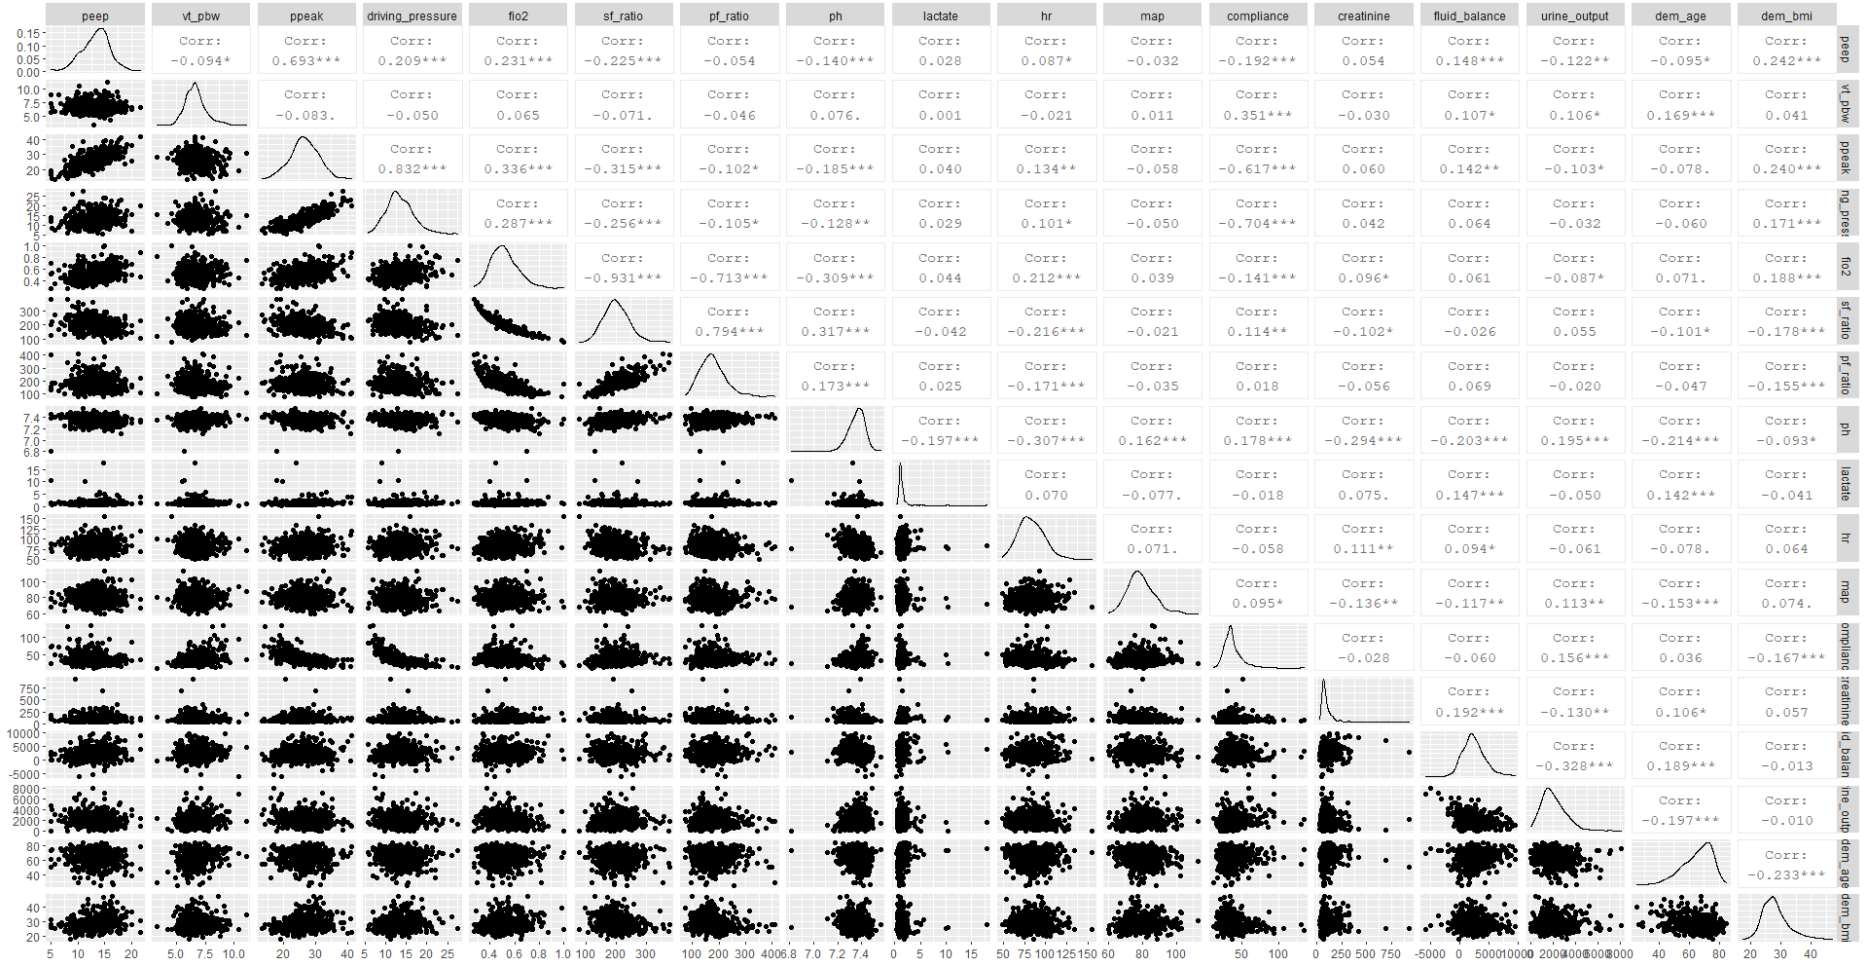

Peak pressure and driving pressure were excluded due to collinearity with respiratory compliance (which was judged to be more important in the model) and  $FiO_2$  was excluded due to collinearity with  $PaO_2 / FiO_2$ .

**Appendix Figure 2 - Test for Linearity Assumption Among Continuous Predictors and Ventilator-Free Days at Day 28**

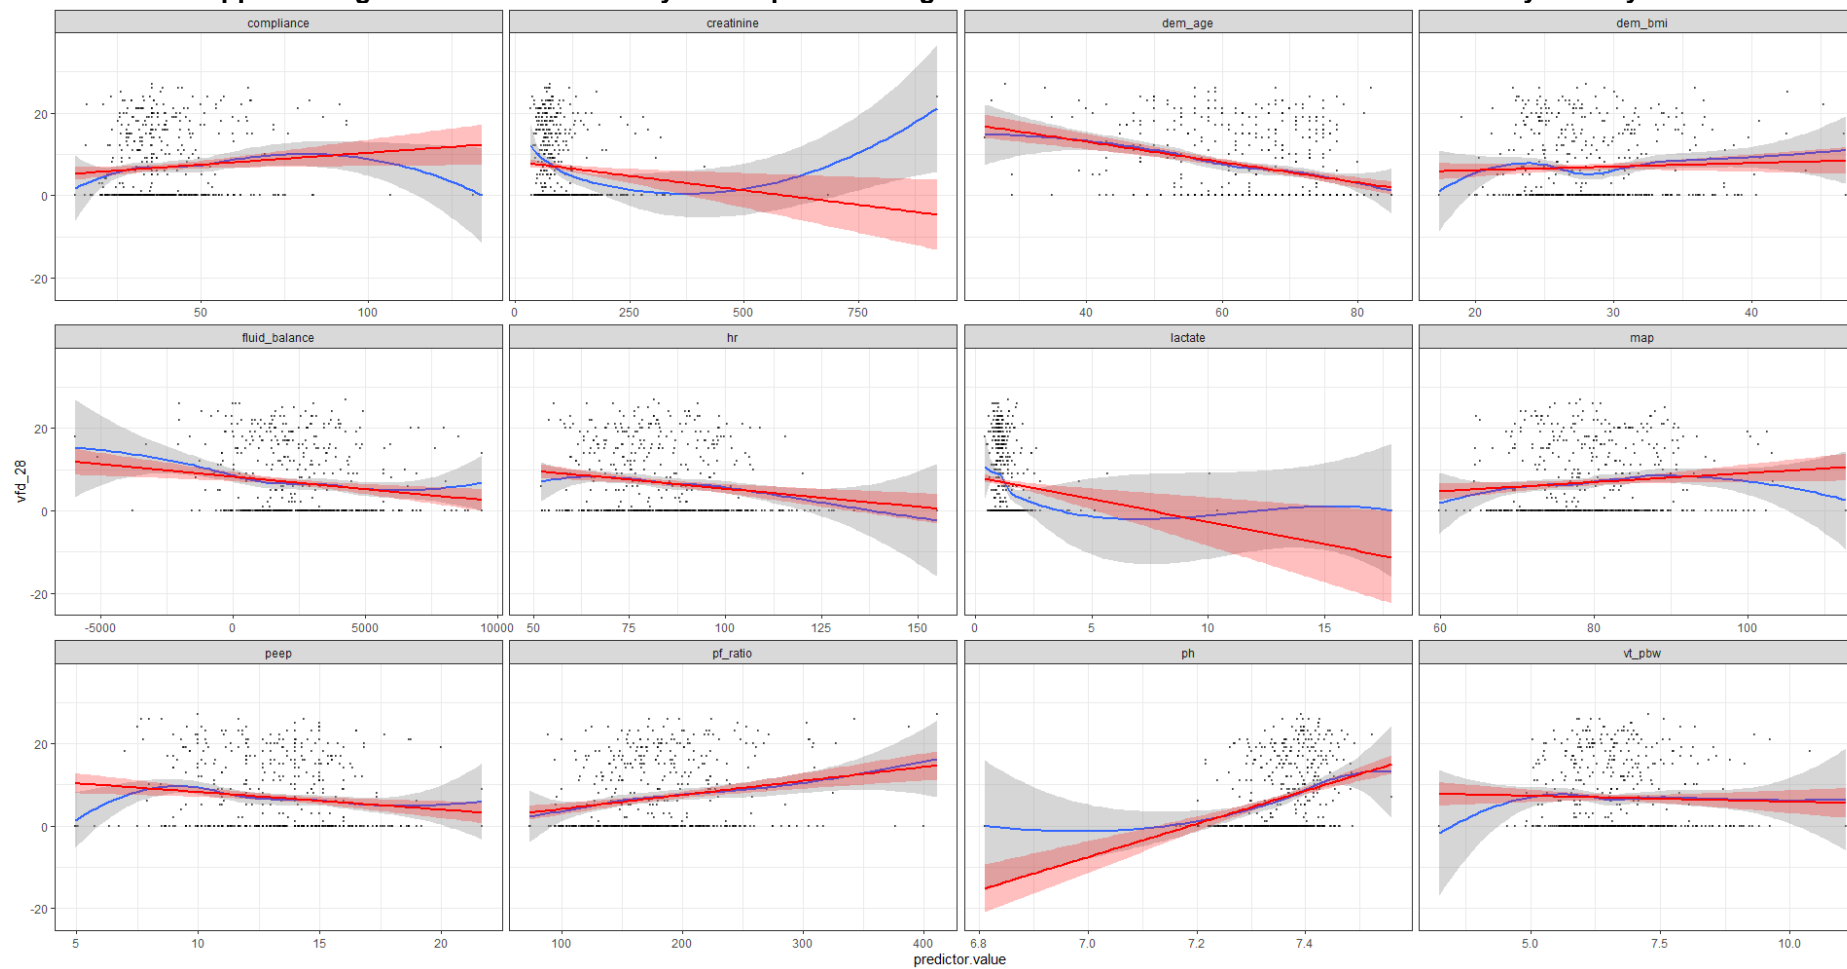

Blue line is a LOESS curve and red line is from a linear regression.

**Appendix Figure 3 – Histogram of Respiratory System Compliance at the First Day of Ventilation**

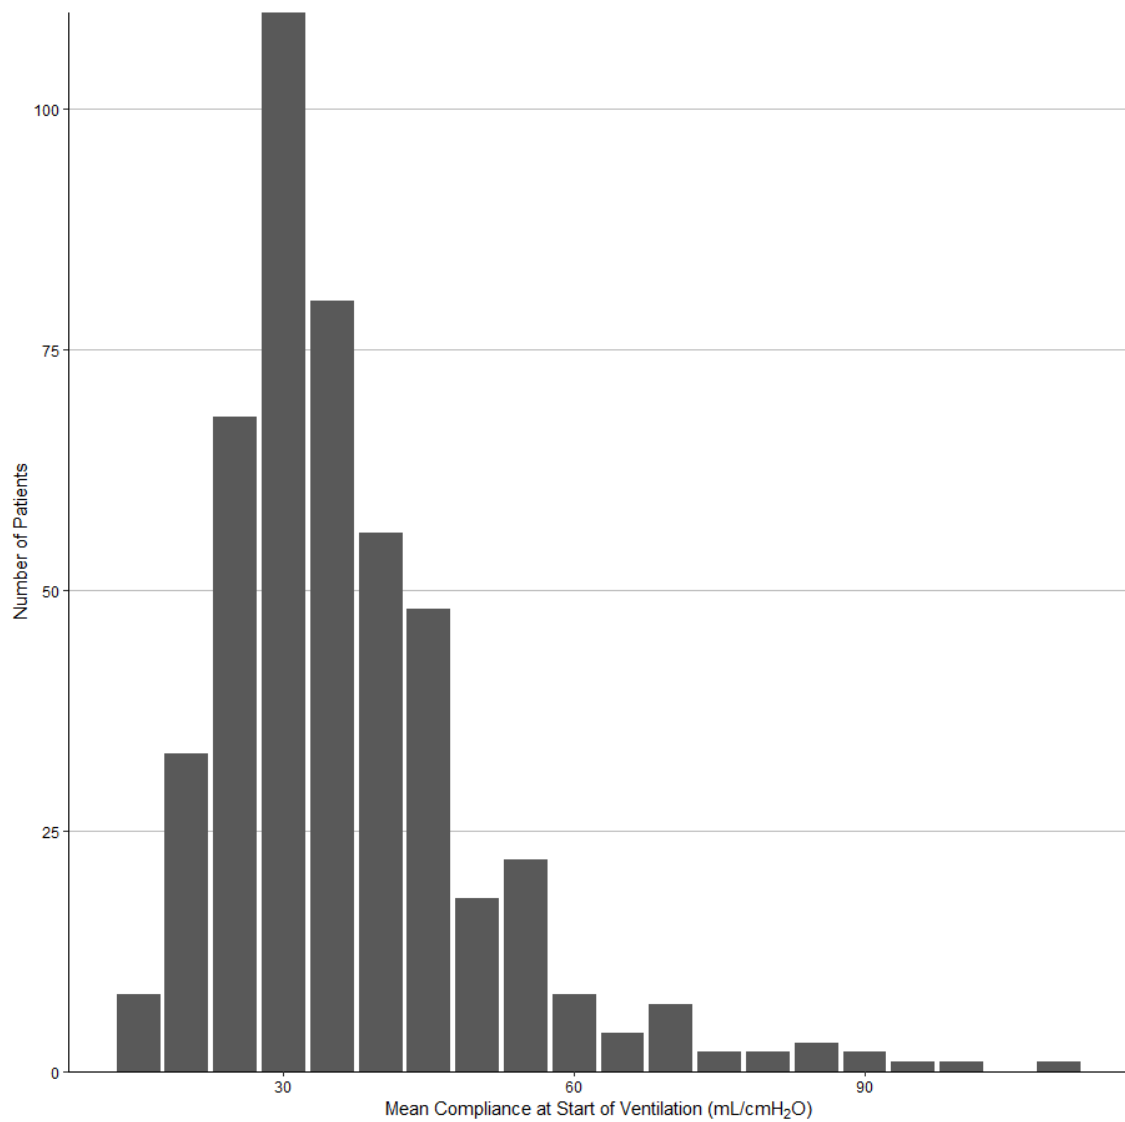

Values were mean from three measurements during the day.



**Appendix Figure 4 – Relationship Between Respiratory System Compliance and Oxygenation in the First Day of Ventilation**

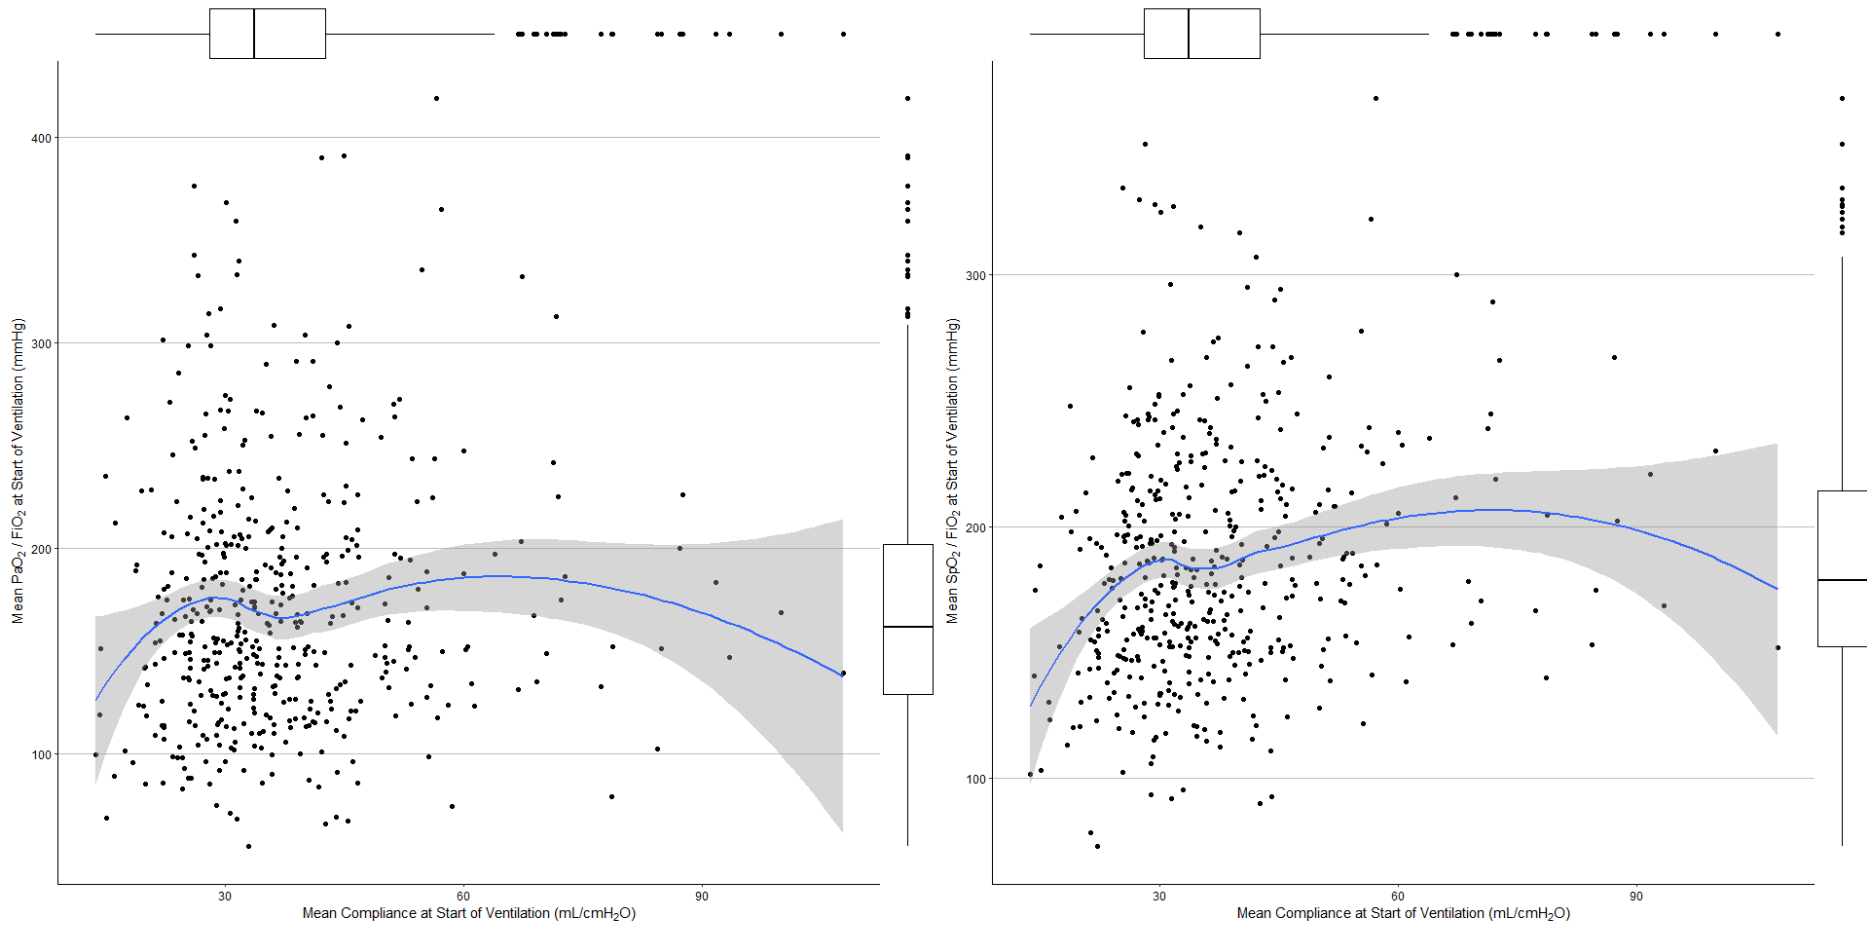

Values were mean from three measurements during the day. A robust locally weighted scatter plot smoothing (LOWESS) method was applied to investigate the relationship between the variables. The smoothing curves used a bandwidth of 0.75, a polynomial regression with 1 degree of freedom, and a tricubic weight function so that observations furthest from the point of interest were assigned the least weight.

**Appendix Figure 5 – Trend of Ventilatory Variables of the First Three Days of Ventilation**

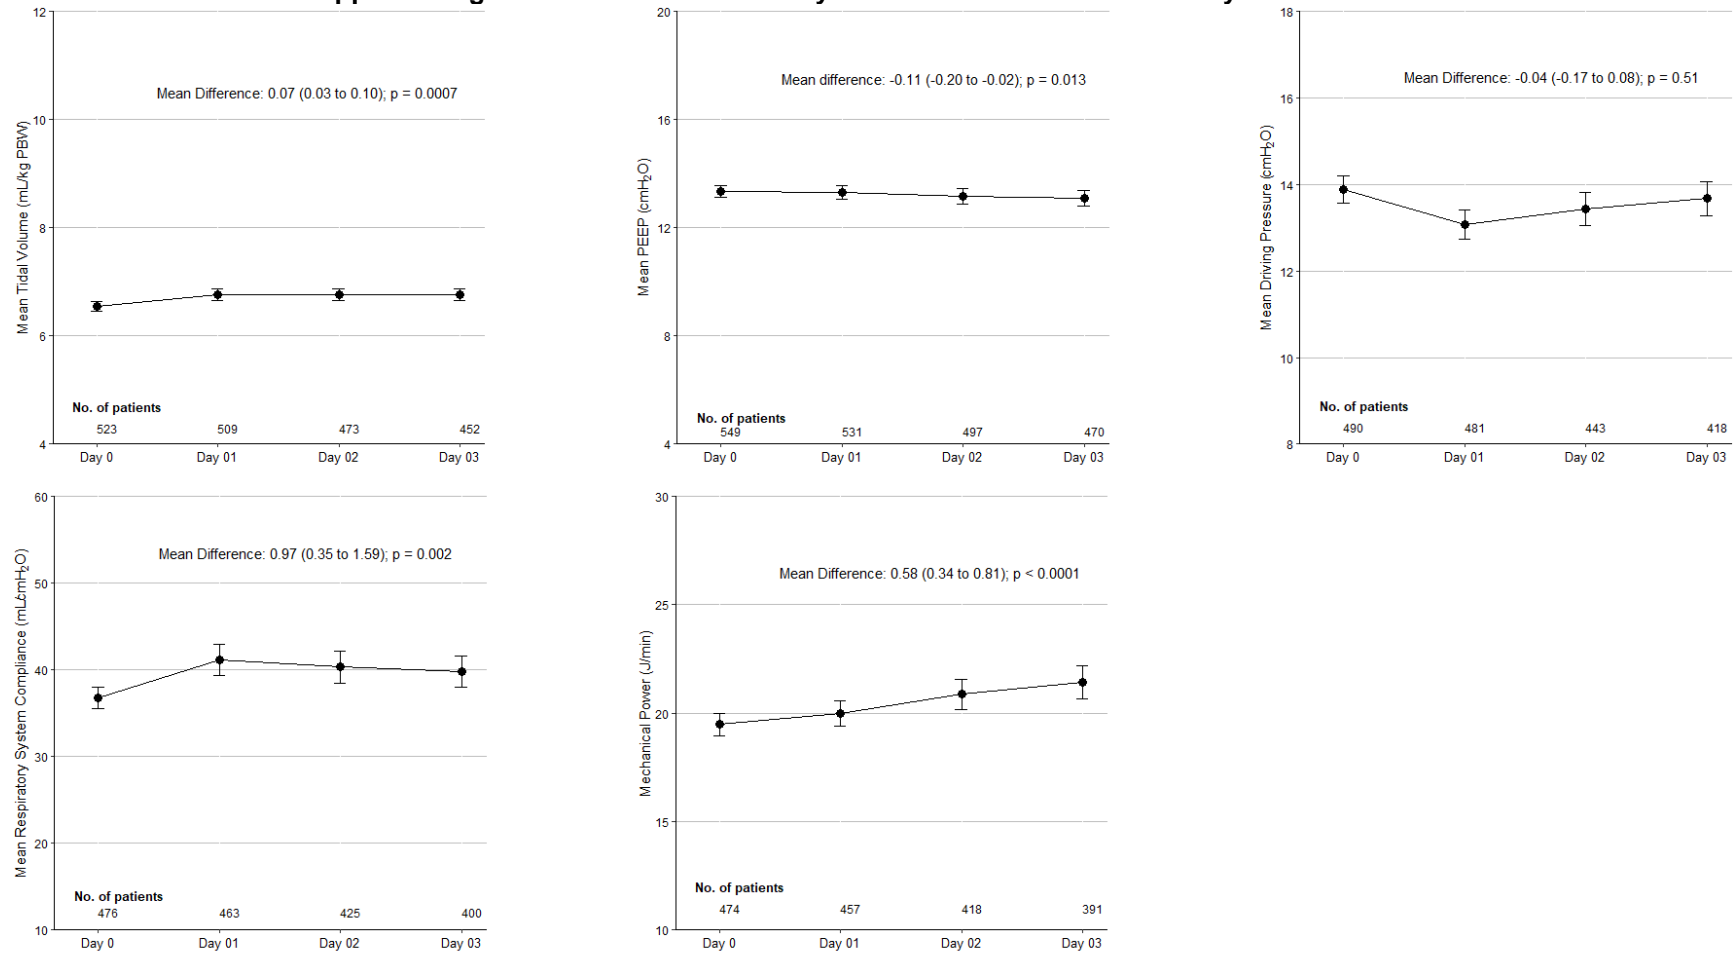

*P* value was calculated from a mixed-effect linear model with centre as random effect, with random slopes and intercept for patients and with an unstructured covariance matrix. Circles are mean from three measurements each day and error bars are 95% confidence interval.

**Appendix Figure 6 – Trend of Oxygenation Variables of the First Three Days of Ventilation**

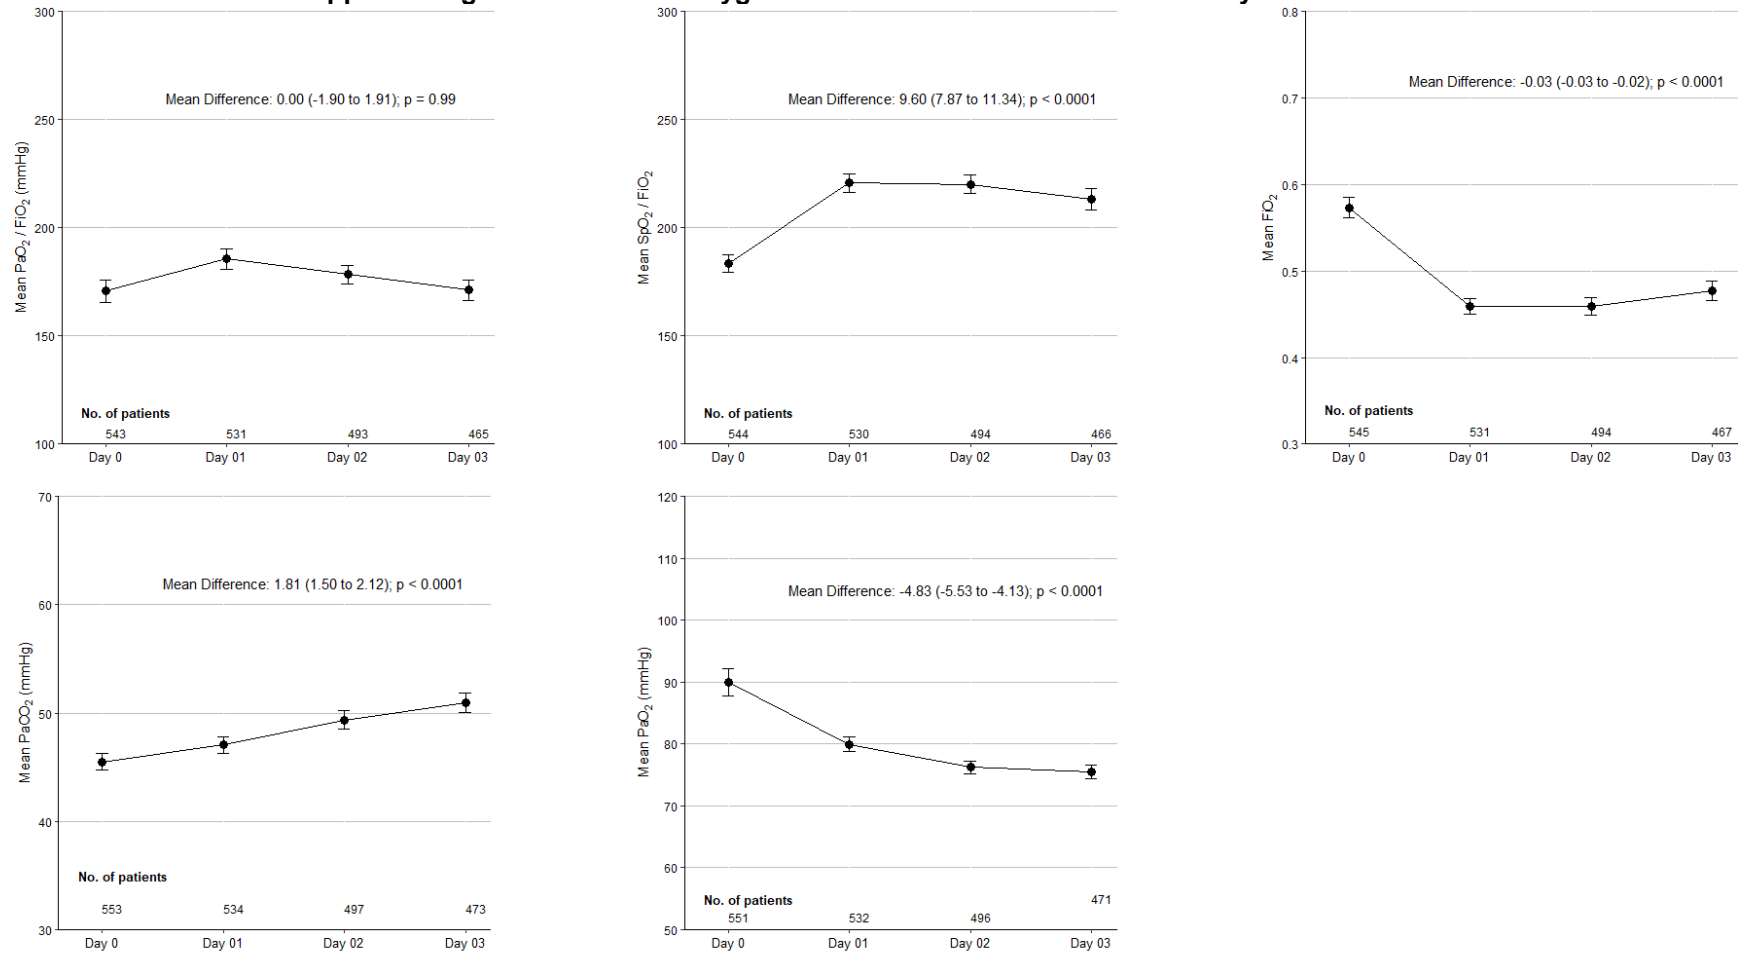

*P* value was calculated from a mixed-effect linear model with centre as random effect, with random slopes and intercept for patients and with an unstructured covariance matrix. Circles are mean from three measurements each day and error bars are 95% confidence interval.

**Appendix Figure 7 – Cumulative Distribution Plots of Ventilatory and Oxygenation Variables**

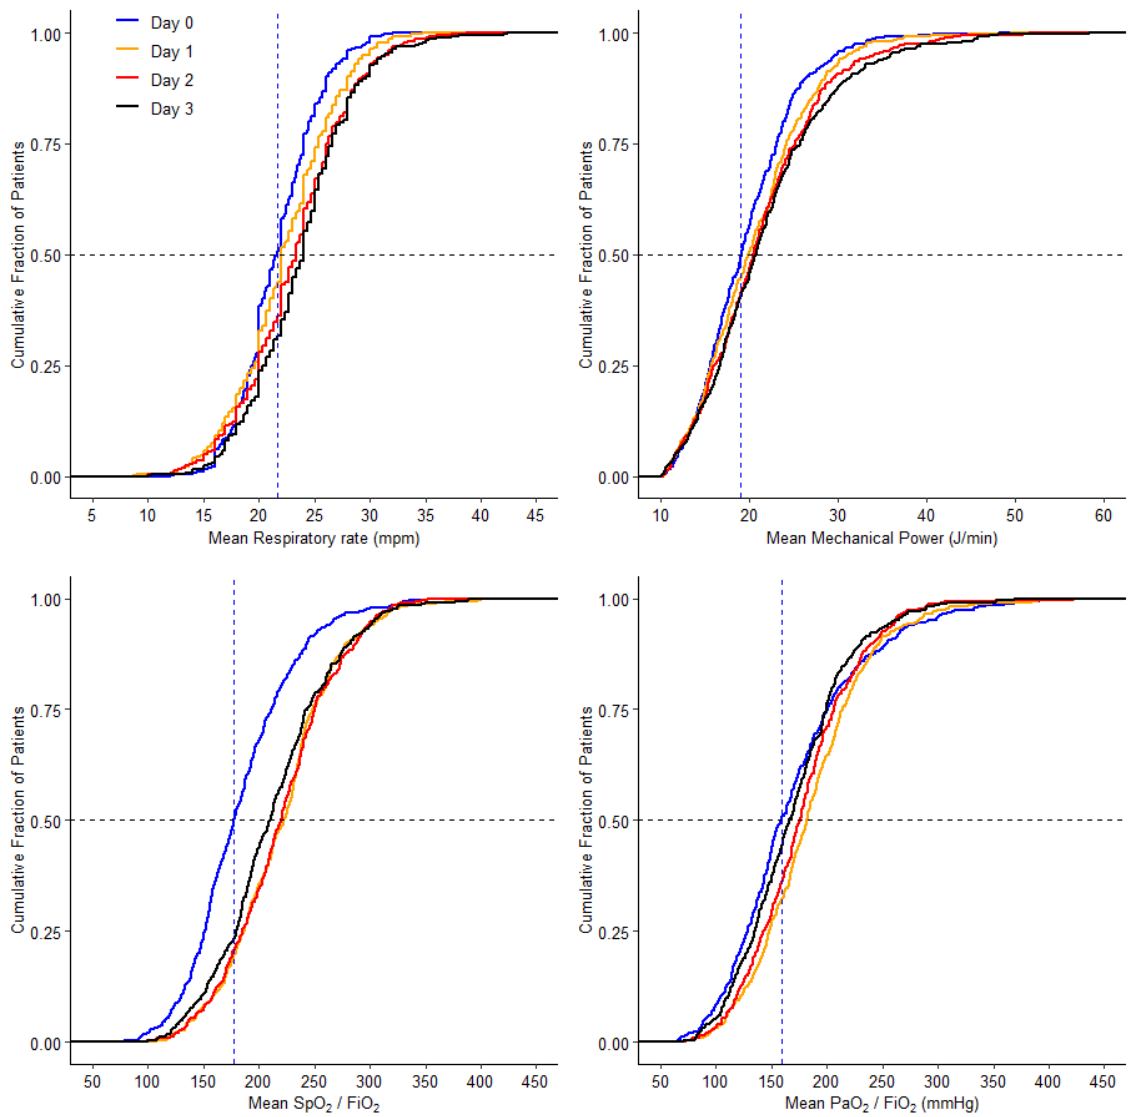

Horizontal dotted lines represent 50% of the patients and vertical dotted lines represent the median of the variable at the start of ventilation. All measurements are mean over three measurements per day.

**Appendix Figure 8 – Cumulative Distribution Plots of Ventilatory and Oxygenation Variables**

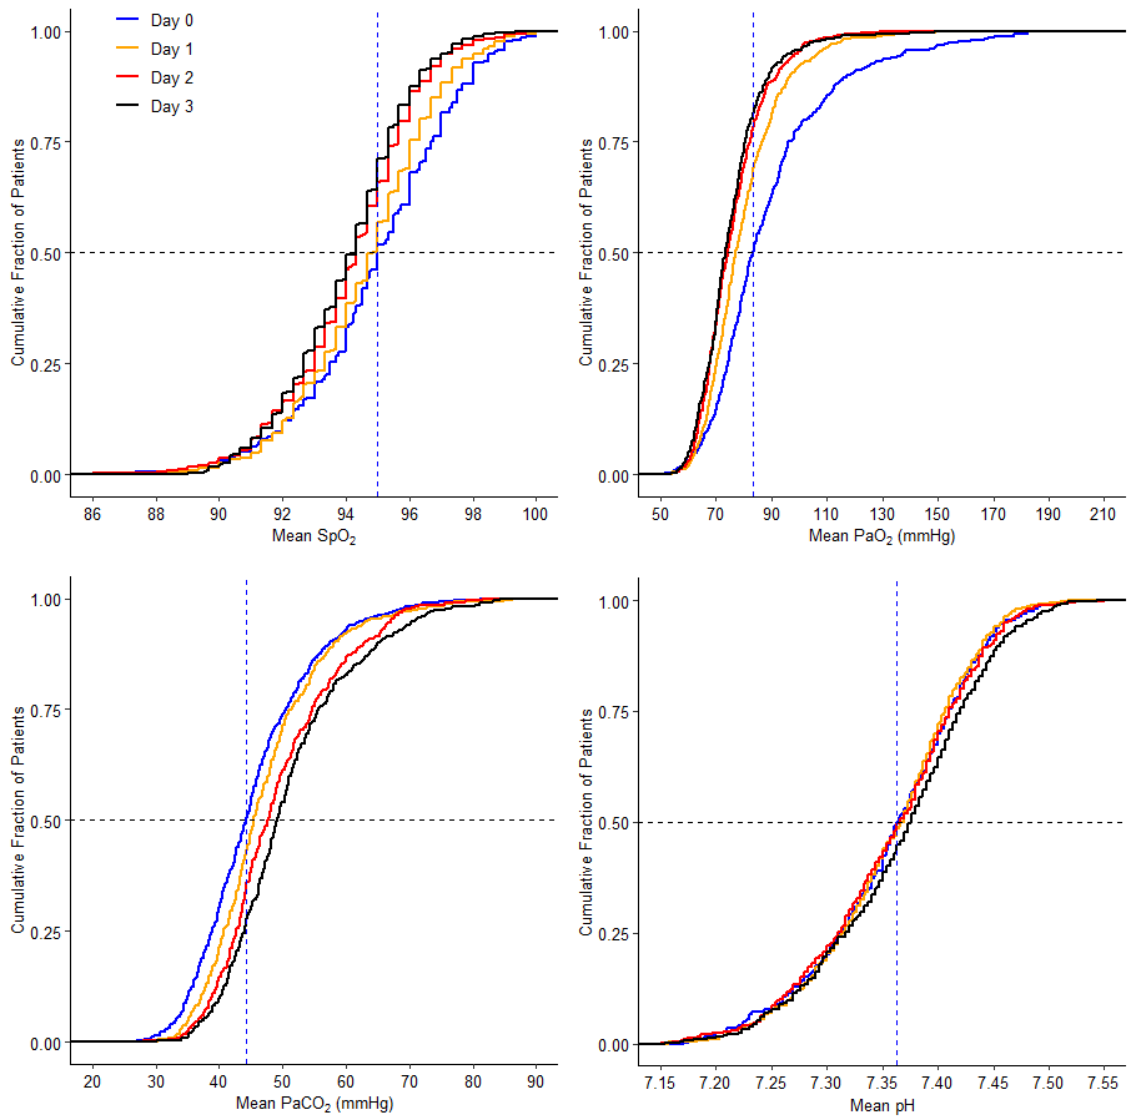

Horizontal dotted lines represent 50% of the patients and vertical dotted lines represent the median of the variable at the start of ventilation. All measurements are mean over three measurements per day.

**Appendix Figure 9 – Trend of Urinary Variables of the First Three Days of Ventilation**

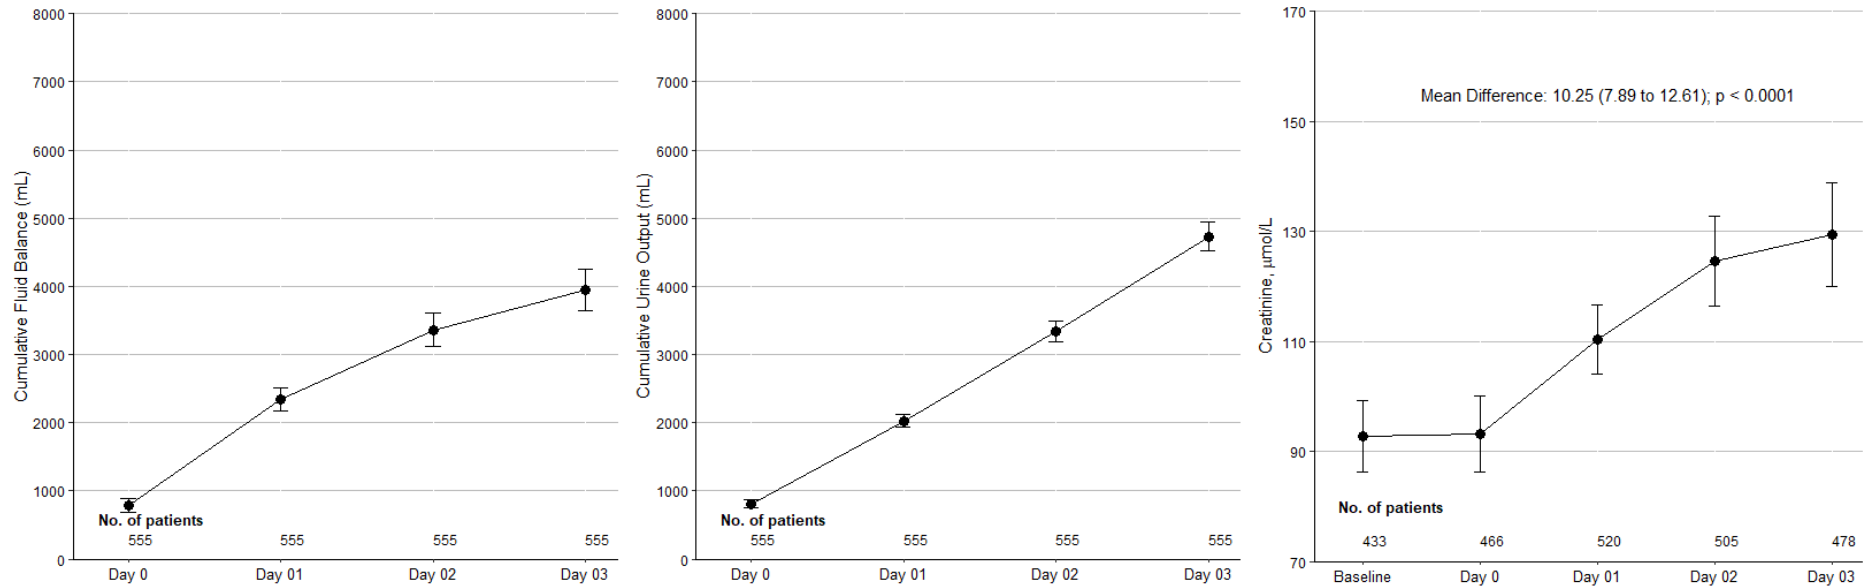

*P* value was calculated from a mixed-effect linear model with centre as random effect, with random slopes and intercept for patients and with an unstructured covariance matrix. Circles are mean from three measurements each day and error bars are 95% confidence interval. *P* value was not calculated for cumulative fluid balance and urine output because cumulative variables are expected to increase over time.

**Appendix Figure 10 – 28-day Mortality According to Age and PaO<sub>2</sub> / FiO<sub>2</sub> at the Start of Ventilation**

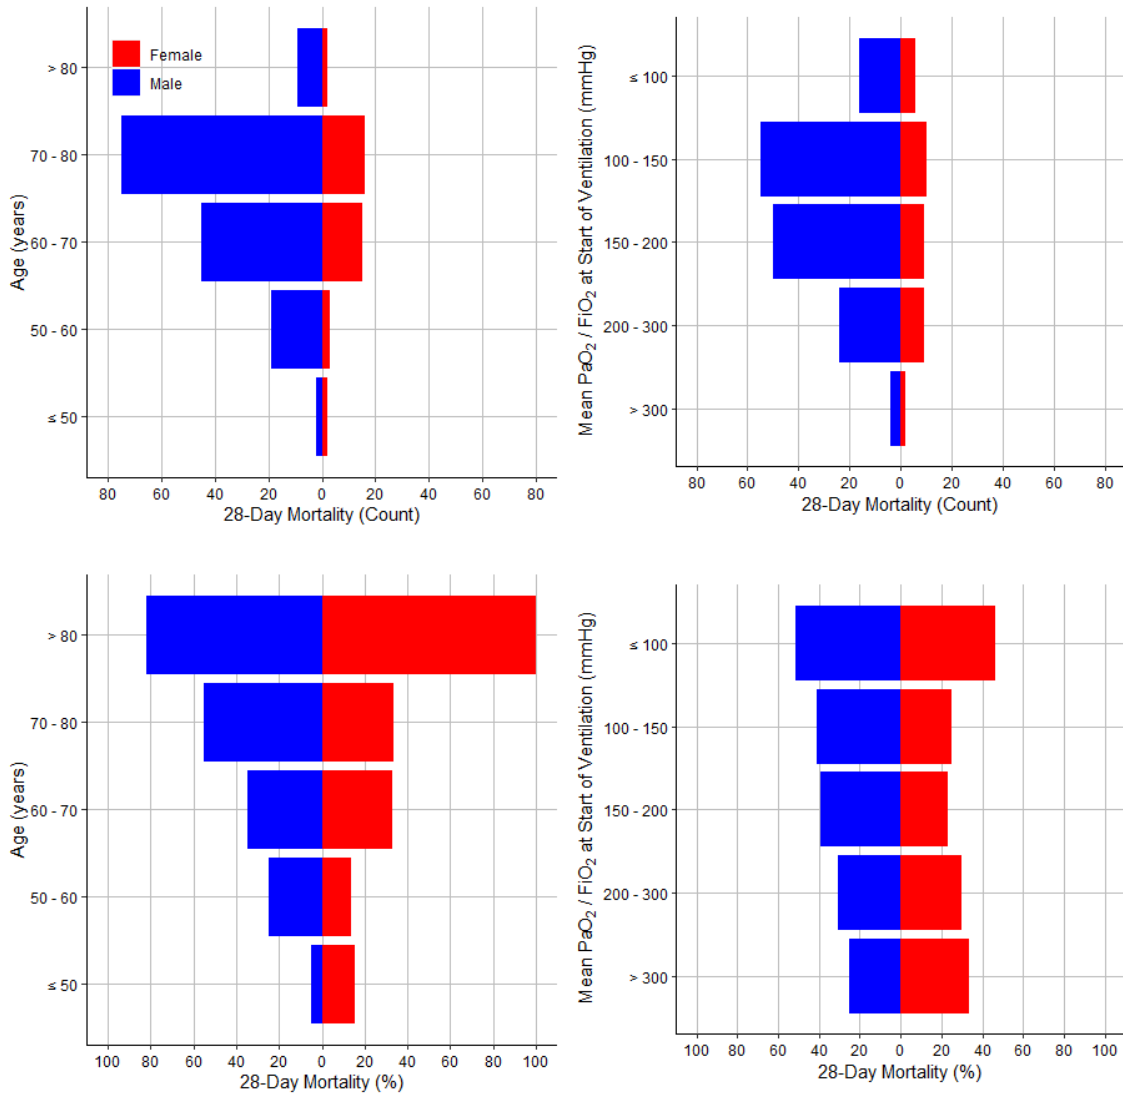

Mortality rates in groups stratified for age and mean PaO<sub>2</sub>/FiO<sub>2</sub>

**Appendix Figure 11 – 28-day Mortality According to Body Mass Index and Respiratory System Compliance at the Start of Ventilation**

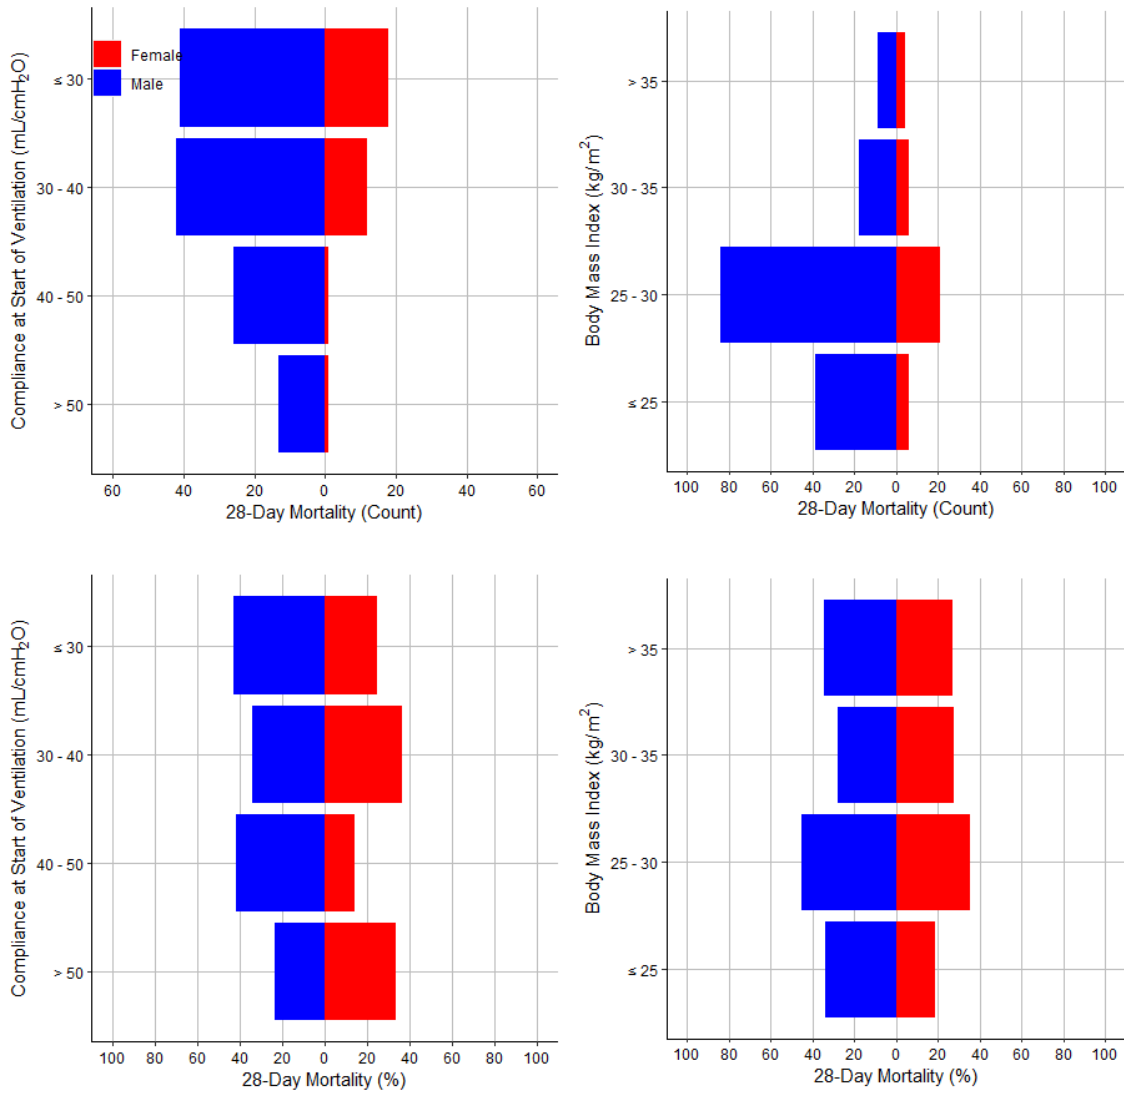

Mortality rates in groups stratified for compliance and Body Mass Index



Appendix Figure 12 - Results of the Final Multivariable Model for 28-Day Mortality

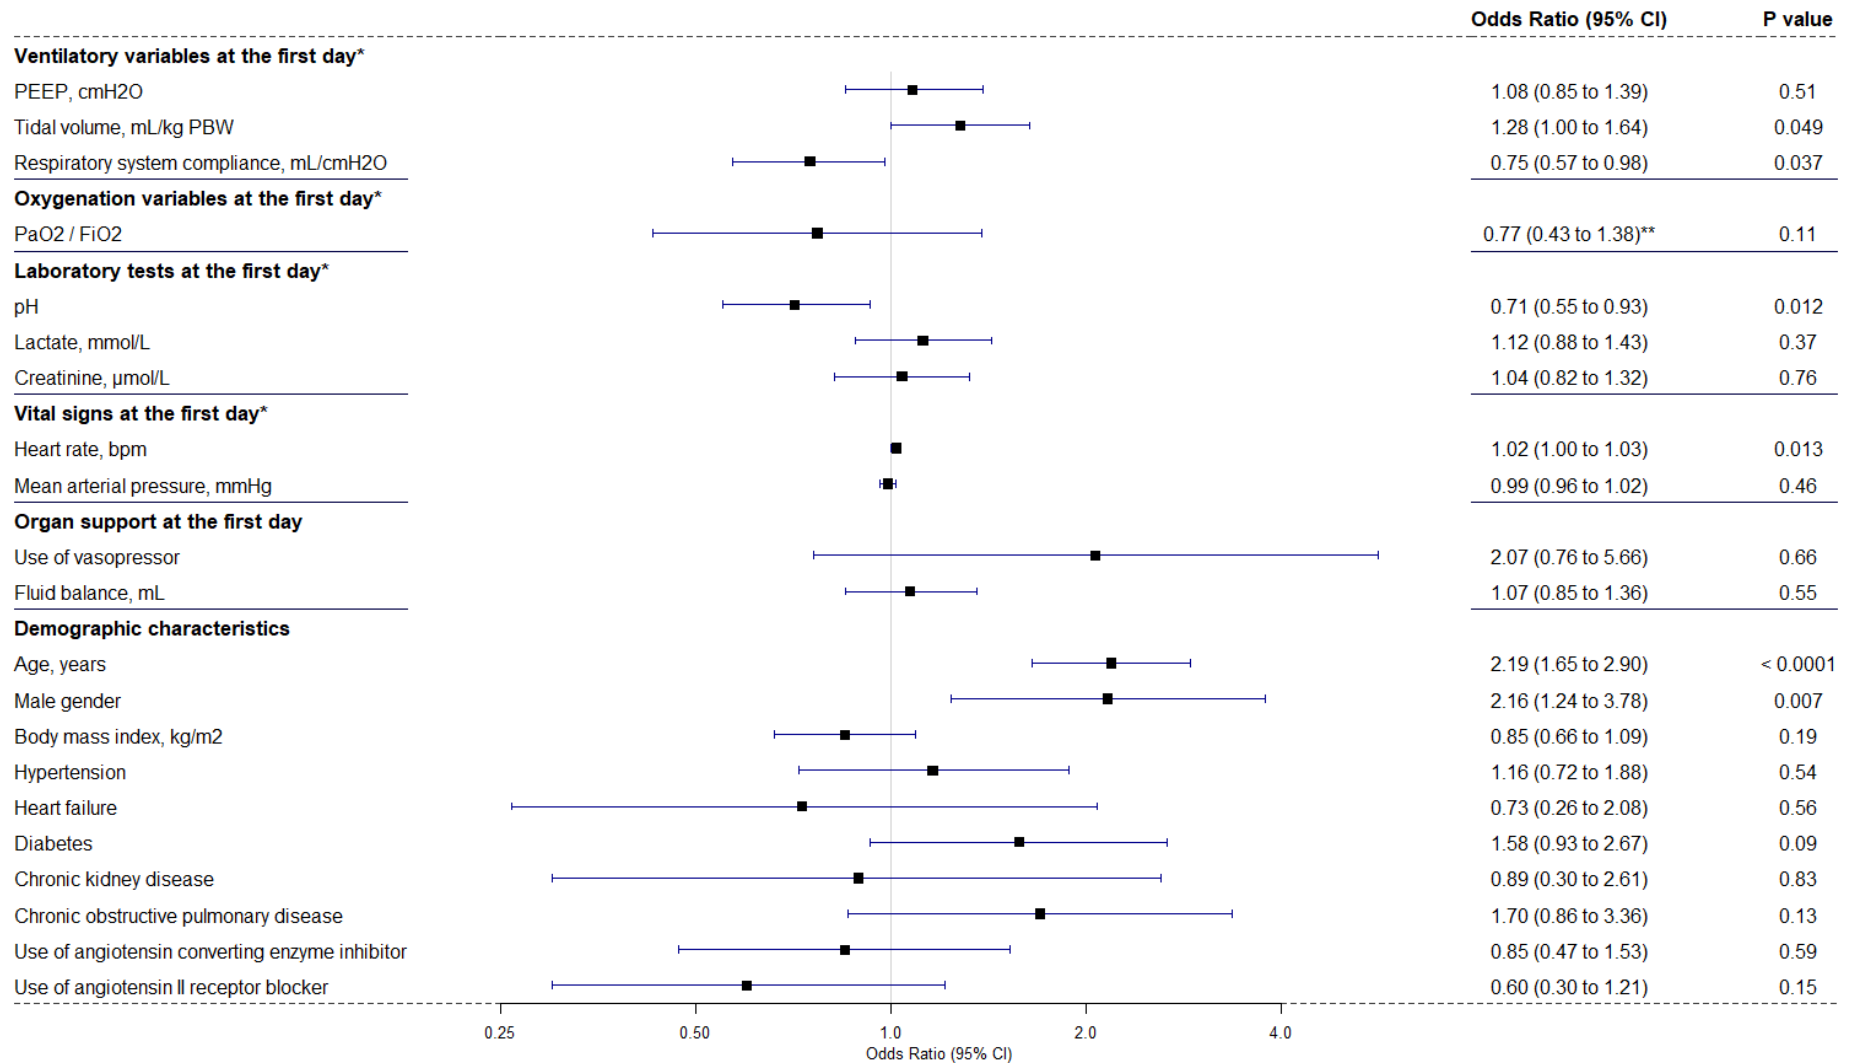

\*\* Variables included as restricted cubic splines and odds ratio is determined over the quartile range observed for the variable (estimated effect of an inter-quartile range increase in the predictor variable) and p value reported is for the first spline.

**Appendix Figure 13 - Discrimination and Calibration of the Multivariable Model Assessing 28-Day Mortality**

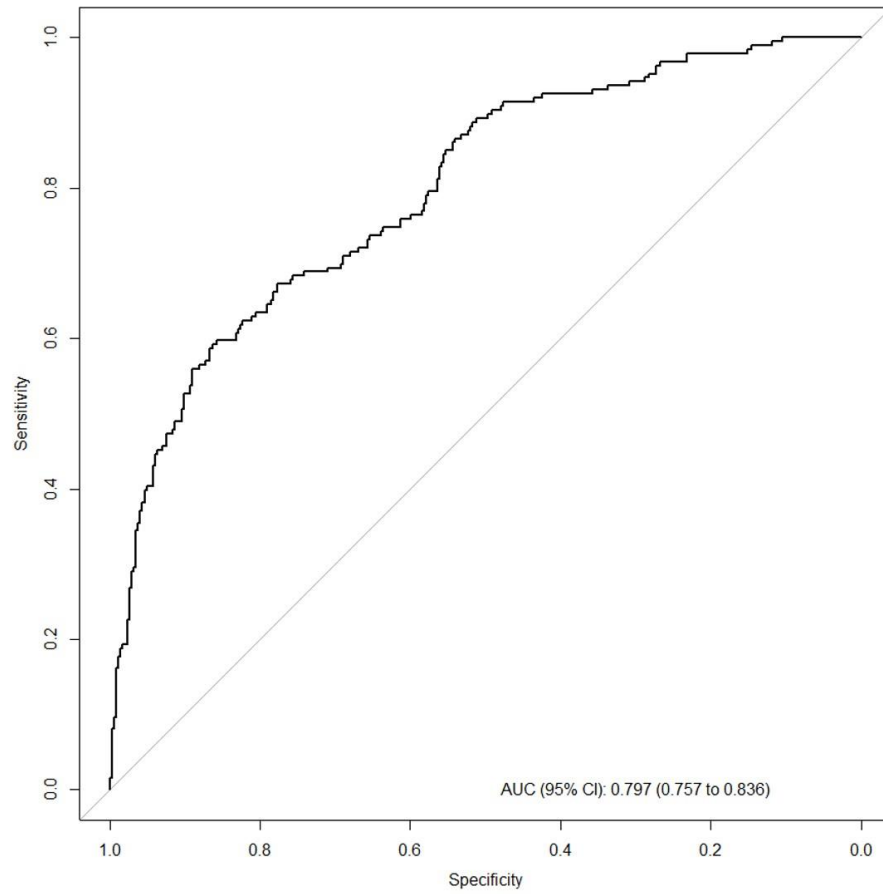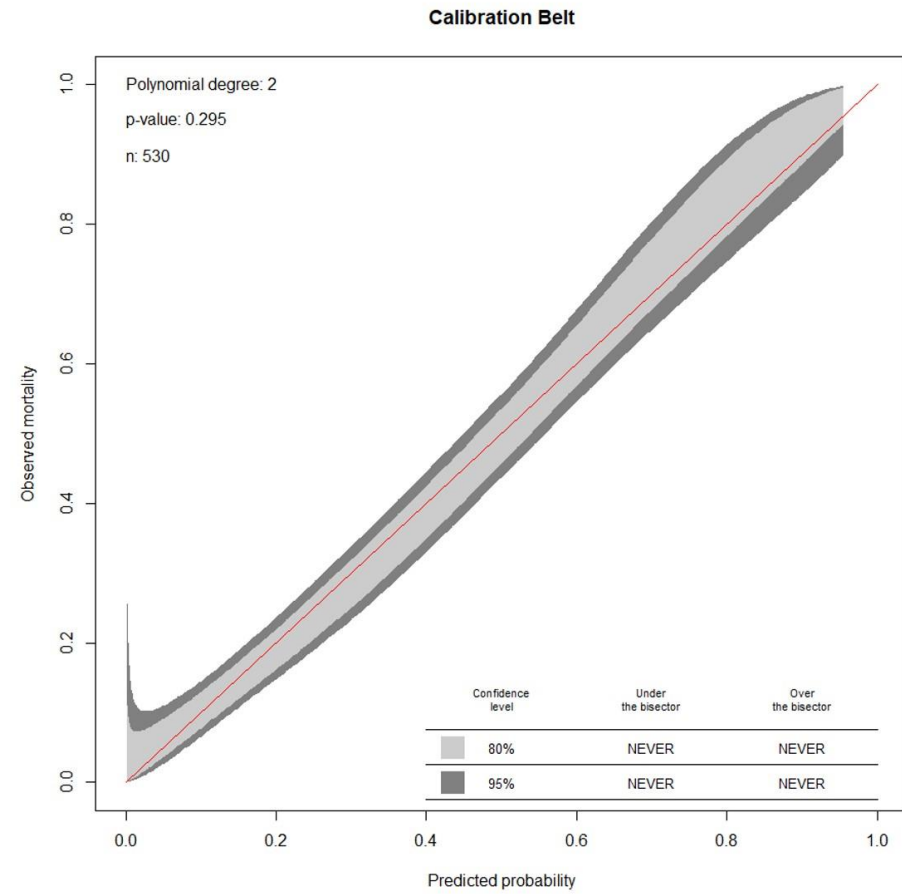

ROC curve and c-statistic is shown in the left plot. Calibration belt is show in the right plot.

Appendix Figure 14 - Results of the Final Multivariable Model for Ventilator-Free Days at Day 28

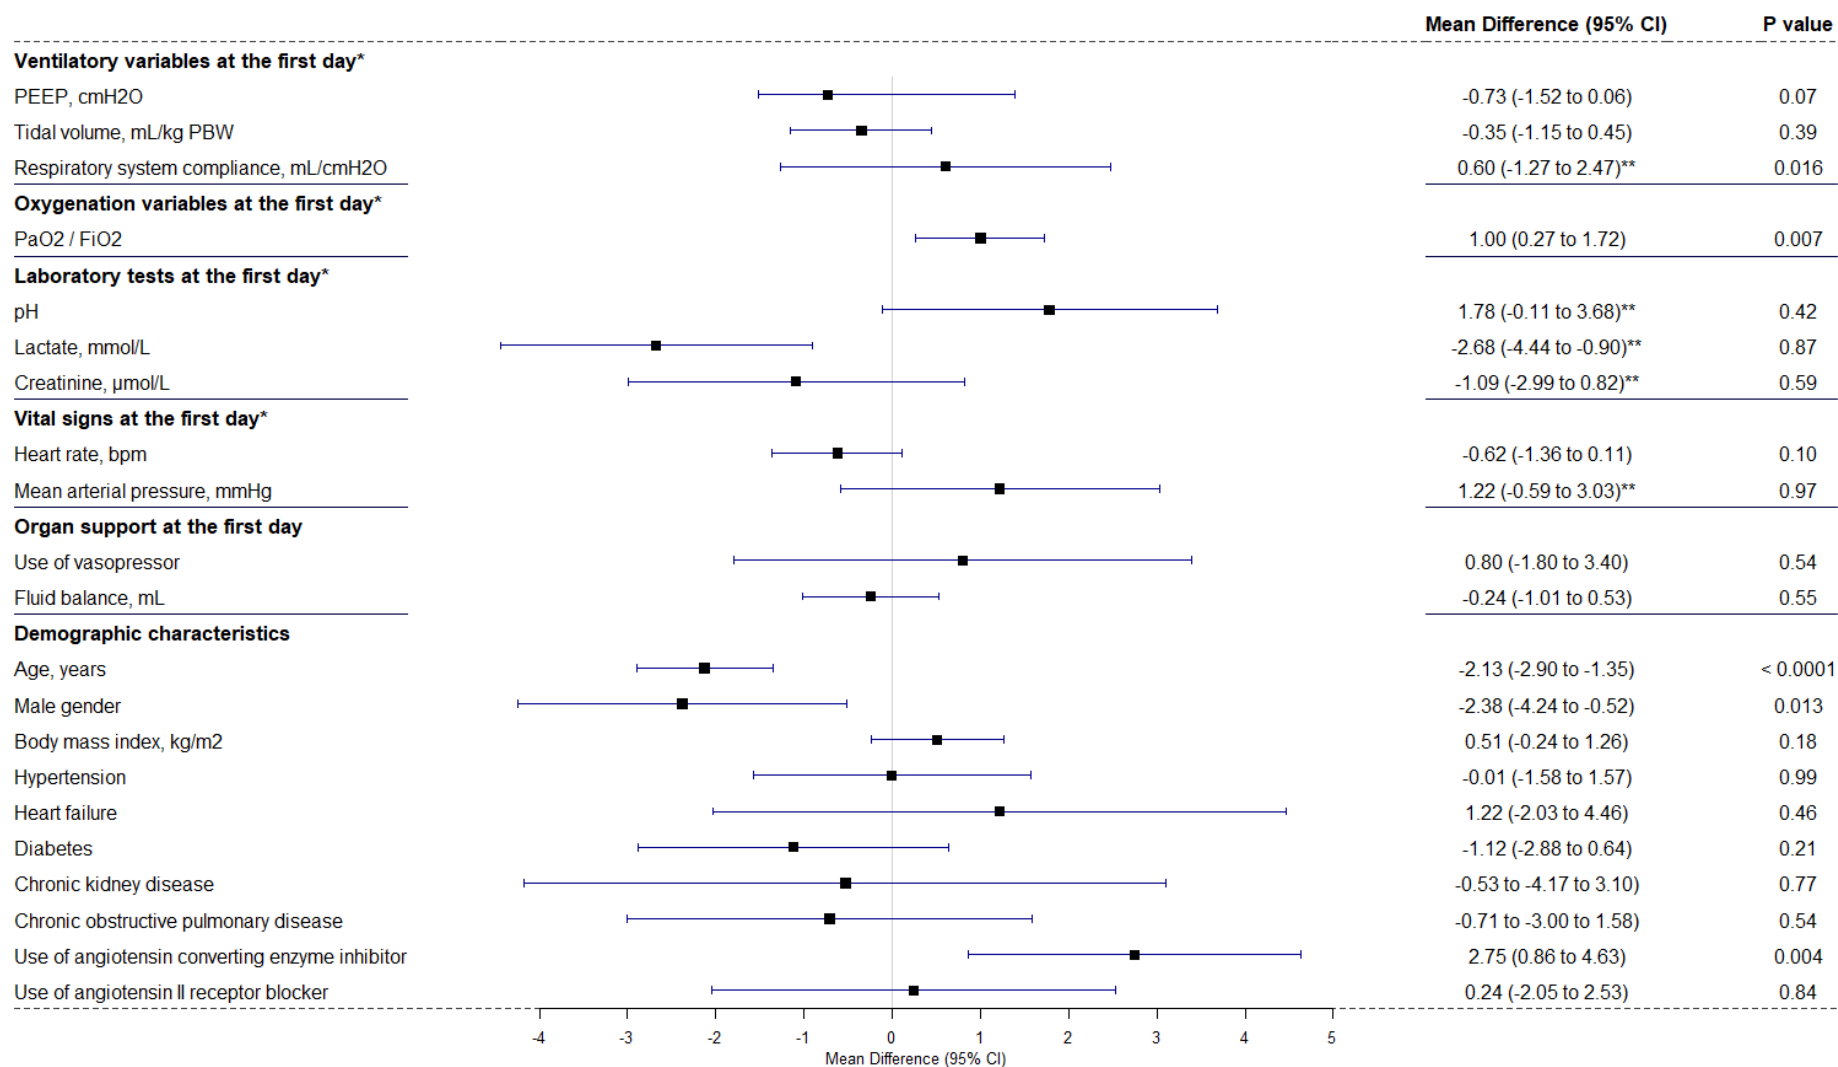

\*\* Variables included as restricted cubic splines and mean difference is determined over the quartile range observed for the variable (estimated effect of an inter-quartile range increase in the predictor variable) and p value reported is for the first spline.

Appendix Figure 15 - Normality of Residuals in the Ventilator-Free Days at Day 28 Model

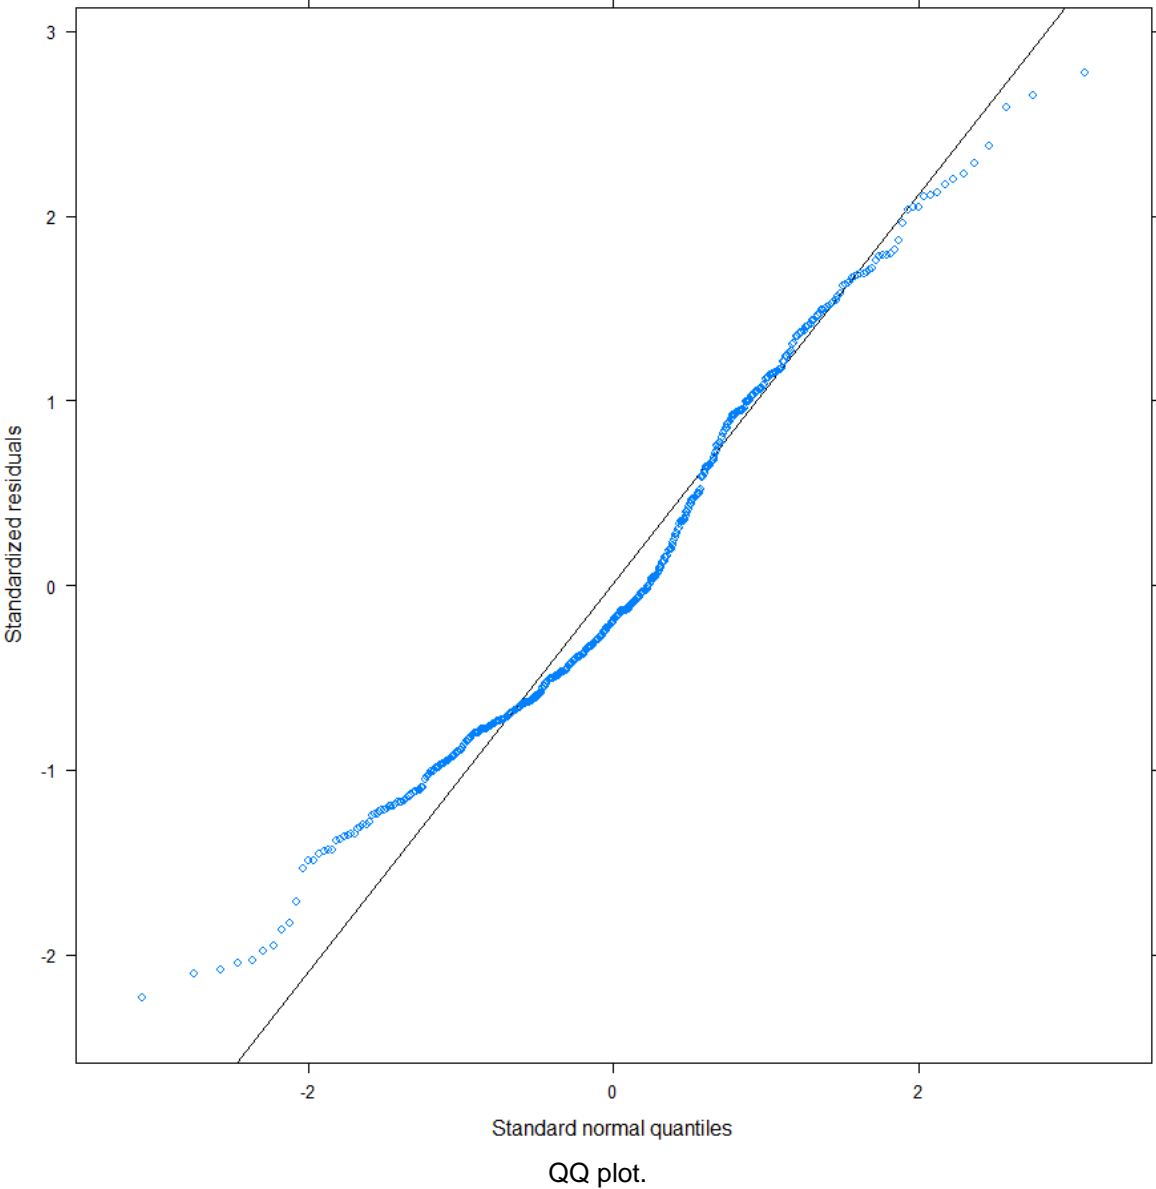

**Appendix Figure 16 - Cumulative Incidence of Extubation with Death Before Extubation Treated as a Competing Risk and 28-Day Survival in Overall Cohort**

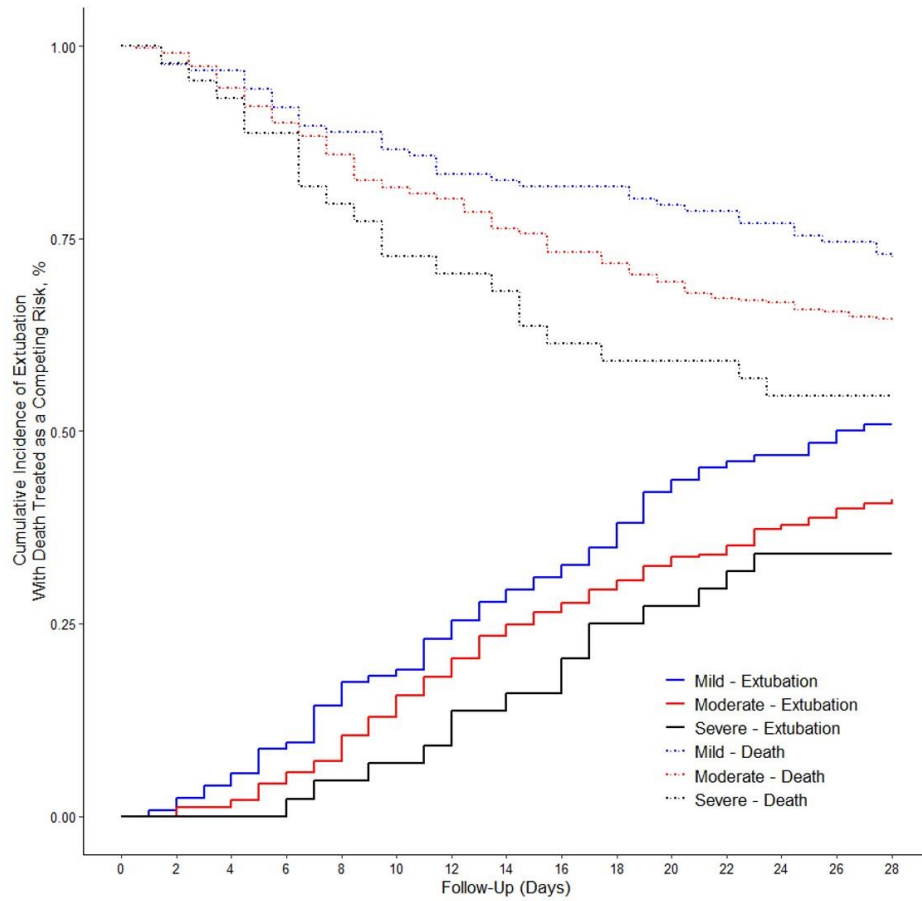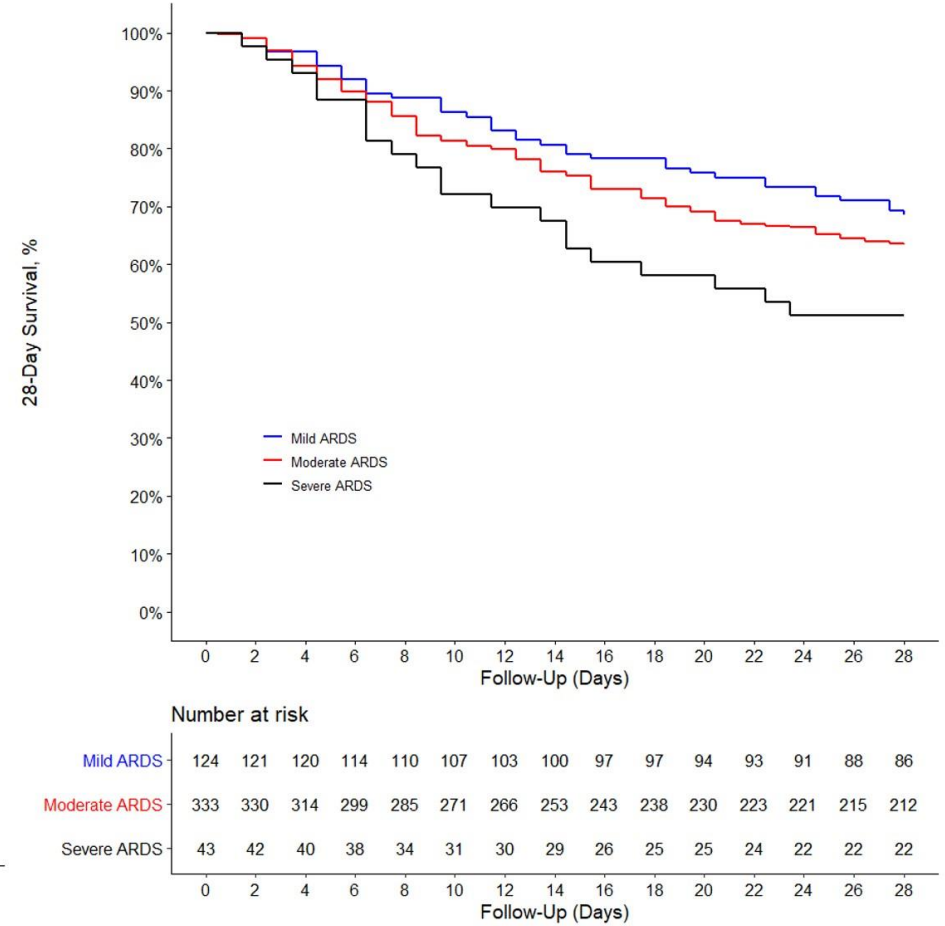

Supplement: mmc1.pdf [file mmc1.pdf]
